1 **Growth-driven displacement of protein aggregates along the cell length**  
2 **ensures partitioning to both daughter cells in *Caulobacter crescentus***

3

4 Frederic D. Schramm<sup>1\*</sup>, Kristen Schroeder<sup>1\*</sup>, Jonatan Alvelid<sup>2</sup>, Ilaria Testa<sup>2</sup> and Kristina  
5 Jonas<sup>1§</sup>

6

7 <sup>1</sup> Science for Life Laboratory and Department of Molecular Biosciences, The Wenner-Gren  
8 Institute, Stockholm University, 10691 Stockholm, Sweden

9 <sup>2</sup> Science for Life Laboratory and Department of Applied Physics, KTH Royal Institute of  
10 Technology, 10044 Stockholm, Sweden

11

12 \* Equal contribution

13 § Correspondence: kristina.jonas@su.se, Phone: +46 8 16 2580

## 14 **Abstract**

15 All living cells must deal with protein aggregation, which can occur as a result of experiencing  
16 stress. In the bacteria *Escherichia coli* and *Mycobacterium smegmatis*, aggregates collect at the  
17 cell poles and are retained over consecutive cell divisions only in the daughter cell that inherits  
18 the old pole, resulting in aggregation-free progeny within a few generations. Here we have  
19 studied the *in vivo* kinetics of aggregate formation and clearance following heat and antibiotic  
20 stress in *Caulobacter crescentus*, which divides by a pre-programmed asymmetric cell cycle.  
21 Unexpectedly, we find that aggregates do not preferentially collect at the cell poles, but form  
22 as multiple distributed foci throughout the cell volume. Time-lapse microscopy revealed that  
23 under moderate stress, the majority of protein aggregates are short-lived and rapidly dissolved  
24 by the major chaperone DnaK and the disaggregase ClpB. Severe stress or genetic perturbation  
25 of the protein quality machinery results in long-lived protein aggregates, which individual cells  
26 can only clear by passing on to their progeny. Importantly, these persistent aggregates are  
27 neither collected at the old pole over multiple generations nor inherited exclusively by the old  
28 pole-inheriting stalked cell, but instead are partitioned between both daughter cells during  
29 successive division events in the same ratio. Our data indicate that this symmetric mode of  
30 aggregate inheritance is driven by the elongation and division of the growing mother cell. In  
31 conclusion, our study revealed a new pattern of aggregate inheritance in bacteria.

## 32 **Introduction**

33 Exposure to various types of environmental stress results in the un- and misfolding of proteins,  
34 which poses a threat to continued survival. Sudden unfolding of native proteins, as well as  
35 interference of un- and misfolded proteins with partially folded species can create a functional  
36 deficit which impairs essential cellular processes and may lead to the death of the cell. All forms  
37 of life therefore rely on protein quality control systems to prevent accumulation of un- and  
38 misfolded proteins. The main participants in these systems are molecular chaperones and  
39 proteases that refold or degrade un- and misfolded proteins in order to maintain protein  
40 homeostasis as conditions fluctuate (Hartl et al., 2011). Acute stress can lead to exhaustion of  
41 the chaperoning and degradation capacity of the cell, resulting in aggregation of proteins that  
42 cannot be restored to their native state, either temporarily or indefinitely (Santra et al., 2018;  
43 Tyedmers et al., 2010). Sequestering un- or misfolded proteins into more inert particles has  
44 been proposed to lead to an immediate easing of the burden on the chaperone machinery, and  
45 can even be chaperone driven (Grousl et al., 2018; Ungelenk et al., 2016).

46 How cells cope with protein aggregates can differ depending on the type and amount of  
47 aggregated proteins present, but the highly conserved chaperone systems are responsible for  
48 effecting survival. Small heat shock proteins (sHSPs) associate with aggregated protein to  
49 maintain it in a refolding-competent state and can also promote the fusion of aggregates and  
50 facilitate their resolution (Coelho et al., 2014; Specht et al., 2011; Ungelenk et al., 2016). The  
51 cytoplasmic DnaK/Hsp70 chaperone and the ClpB/Hsp104 disaggregase bind insoluble  
52 aggregates and work in concert on their dissolution, returning proteins to their folded state  
53 (Glover and Lindquist, 1998; Goloubinoff et al., 1999). Additionally, cytosolic proteases  
54 contribute to aggregate resolution through the degradation of the constituent proteins (Heck et  
55 al., 2010; Tomoyasu et al., 2001).

56           If aggregates persist for a prolonged time and remain even after conditions improve,  
57 asymmetric distribution of insoluble deposits to daughter cells has been suggested to provide  
58 an effective means of sequestering un- and misfolded protein from a part of the population (Hill  
59 et al., 2016; Lindner et al., 2008; Vaubourgeix et al., 2015; Vedel et al., 2016; Winkler et al.,  
60 2010). For example, the budding yeast *Saccharomyces cerevisiae* retains aggregates in the  
61 mother cell both by active and passive mechanisms to generate aggregate-free daughter cells  
62 (Erjavec et al., 2007; Higuchi et al., 2013; Spokoini et al., 2012; Zhou et al., 2011). Although  
63 accumulation of protein aggregates has generally been associated with cell ageing and other  
64 pathology (Aguilaniu et al., 2003; Mogk et al., 2018; Nyström and Liu, 2014; Shcheprova et  
65 al., 2008), several recent studies suggest that the carriage of persistent protein aggregates may  
66 also confer a fitness advantage and promote survival (Govers et al., 2018; Saarikangas and  
67 Barral, 2015; Wallace et al., 2015).

68           So far, most studies addressing the *in vivo* dynamics of protein aggregate formation and  
69 clearance have been performed in eukaryotes. However, bacteria in particular frequently  
70 encounter stress conditions that perturb protein homeostasis, including heat, oxidative or  
71 antibiotic stress. In *Escherichia coli*, protein aggregates mostly accumulate at the chromosome-  
72 free polar regions of the cell (Kumar and Sourjik, 2012; Winkler et al., 2010). With successive  
73 cell divisions, this localization rapidly results in the production of aggregate-free cells (Govers  
74 et al., 2014; Lindner et al., 2008; Winkler et al., 2010). Similarly, slow-growing *Mycobacteria*  
75 were shown to collect irreversibly damaged proteins at the pole and distribute them  
76 asymmetrically to progeny, again resulting in aggregate-free daughter cells upon cell division  
77 (Fay and Glickman, 2014; Vaubourgeix et al., 2015). In both *E. coli* and *Mycobacterium*, the  
78 carriage of ancestral protein aggregates has been associated with a decline in growth rate  
79 (Lindner et al., 2008; Vaubourgeix et al., 2015; Winkler et al., 2010). However, a more recent  
80 study argues that *E. coli* cells inheriting protein aggregates along with components of the

81 protein quality control machinery show an increased robustness to subsequent proteotoxic  
82 stress (Govers et al., 2018). Despite insight into the strategies and physiological consequences  
83 of aggregate distribution employed by *E. coli* and *Mycobacteria*, it remains poorly understood  
84 how other bacteria deal with protein aggregates in response to changing growth conditions. Of  
85 particular interest is how protein aggregation is handled by bacterial species possessing an  
86 intrinsically asymmetric life cycle, generating daughter cells with distinct cell fates.

87 The  $\alpha$ -proteobacterium *Caulobacter crescentus* has long been a model organism of  
88 bacterial cell type differentiation as it undergoes asymmetric cell division. Each division cycle  
89 of *C. crescentus* yields two non-identical daughter cells, a motile, non-replicative swarmer cell,  
90 and a surface-attached and replication competent stalked cell (Curtis and Brun, 2010). As a  
91 free-living aquatic bacterium, it frequently encounters temperature fluctuations and other  
92 stresses that potentially threaten the folding state of the protein complement. A previous report  
93 has suggested that *C. crescentus* stalked cells undergo a slow replicative aging (Ackermann et  
94 al., 2003). While in yeast, replicative ageing has been attributed to an accumulation of protein  
95 aggregation in the mother cell (Aguilaniu et al., 2003; Coelho et al., 2014; Erjavec et al., 2007;  
96 Hill et al., 2014), the observed decline in the reproductive output of *C. crescentus* remains  
97 largely unexplained. Major components of the general chaperone machinery of *C. crescentus*  
98 have been described and their importance for stress resistance is known (Baldini et al., 1998;  
99 Da Silva et al., 2003; Schramm et al., 2017). However, to date it has not been studied how *C.*  
100 *crescentus* manages protein aggregation during its asymmetric life cycle, and the question  
101 persists if retention of protein damage in the stalked cell may explain the previously observed  
102 ageing effects.

103 In this study we have followed the dynamics of aggregate formation, clearance and  
104 inheritance following heat and antibiotic stress and recovery in *C. crescentus*. We demonstrate  
105 that protein aggregates form as multiple DnaK-attended foci throughout the cell volume and

106 that the mechanism by which cells clear aggregates largely depends on the intensity of stress.  
107 Importantly, we show that in contrast to previously studied bacteria, persistent aggregates that  
108 form as a consequence of severe stress or genetic mutation do not sort to the old pole-containing  
109 stalked cell, but are instead distributed to both daughter cells at the same ratio over successive  
110 divisions.

## 111 **Results**

### 112 **Heat and antibiotic stress induce relocalization of the *C. crescentus* chaperone machinery** 113 **to foci of protein aggregation.**

114 In order to probe the dynamics and requirements of protein aggregation and resolution  
115 in *C. crescentus*, we constructed strains bearing fluorescently-tagged versions of the major heat  
116 shock chaperone DnaK and the bacterial disaggregase ClpB, at their respective native loci (Fig.  
117 1A). Tagging these proteins did not result in viability defects at the optimal growth temperature  
118 of 30°C, although expressing the tagged version of ClpB correlated with a reduction in heat  
119 tolerance (Supporting Information Fig. 1). We found that DnaK tagged with the monomeric  
120 fluorescent protein mVenus (DnaK-mVenus) was diffusely localized throughout cells at a  
121 normal growth temperature of 30°C (Fig. 1B). To probe the localization of DnaK-mVenus at  
122 super-resolution, we imaged cells with stimulated emission depletion (STED) microscopy and  
123 found that the diffuse pattern of DnaK-mVenus at 30°C was representative of many small  
124 clusters of DnaK measuring  $66 \pm 23$  nm (Fig. 1C). Upon exposure to a heat stress temperature  
125 of 40°C, DnaK-mVenus localization changed to a punctate pattern, suggesting that in *C.*  
126 *crescentus* protein aggregation is grouped into multiple foci that are distributed throughout the  
127 cell volume (Fig. 1B). Most cells contained between two and four DnaK-mVenus foci, while  
128 around 10% of the population harbored five or more foci (Fig. 1D). STED imaging of the foci  
129 formed during heat shock revealed large foci that measured  $199 \pm 56$  nm (Fig. 1C). Determining  
130 the cellular position of DnaK-mVenus clusters showed that they occur with similar frequency  
131 along the cell length (Fig. 1E).

132 Disabling ATP hydrolysis of DnaK by introducing a K70A mutation (Barthel et al.,  
133 2001) largely prevented DnaK from relocalizing to foci during heat stress, confirming that  
134 stress-induced DnaK relocalization is a function of its ATP-dependent foldase activity (Fig.  
135 1F). To test whether the observed DnaK foci correspond to sites of protein aggregation, we

136 used the aggregation-prone ELK16 peptide fused to mCherry as a marker for protein  
137 aggregation (Wu et al., 2011), and saw colocalization between DnaK-mVenus and mCherry-  
138 ELK16 foci after heat stress (Fig. 1B). Finally, co-localization experiments with the ClpB-  
139 mCerulean reporter showed that following exposure to heat stress ClpB attends mostly the same  
140 foci as DnaK-mVenus and mCherry-ELK16 (Fig. 1B), while no fluorescence was observed for  
141 the ClpB reporter at the normal growth temperature, in keeping with its heat shock-dependent  
142 expression (Simão et al., 2005). We note that ClpB foci were fewer and that some of the less  
143 intense foci of DnaK and mCherry-ELK16 were not attended by ClpB (Fig. 1B). This  
144 observation may be attributable to the function of ClpB in assisting refolding of large  
145 aggregates (Mogk et al., 2003b) or the reduced functionality of the ClpB-mCerulean fusion  
146 (Supporting Information Fig. 1). In addition to DnaK, ELK16 and ClpB, we have also tagged  
147 the small heat shock protein homolog CCNA\_02341 (hereafter referred to as sHSP1). However,  
148 tagging this protein resulted in increased heat sensitivity, the formation of atypically large  
149 fluorescent clusters, and cell division defects during mild heat stress (Supporting Information  
150 Fig. 1). Based on these experiments we decided to utilize DnaK-mVenus for the visualization  
151 of aggregate localization throughout this study.

152 To determine the relationship between aggregate foci and the *Caulobacter*  
153 chromosome, we stained the DNA using Hoechst 33258 in the DnaK-mVenus reporter strain  
154 sampled at normal temperature as well as after heat shock (Fig. 1G). Surprisingly, aggregate  
155 formation during heat shock was accompanied by a change in the spatial organization of the  
156 DNA from an evenly dispersed to a patchy pattern. Moreover, the locations occupied by protein  
157 aggregates corresponded to regions of reduced DNA staining intensity. These data suggest that  
158 in contrast to *E. coli* and other bacteria, in which the chromosome pushes aggregates to the cell  
159 poles (Coquel et al., 2013; Lindner et al., 2008; Winkler et al., 2010), in *Caulobacter* protein  
160 aggregates appear to displace the chromosome.



161 Aggregate formation was observed at heat shock temperatures of 40°C and 45°C (Fig.  
162 1H), but also upon exposure to sublethal concentrations of kanamycin, which is known to  
163 induce protein aggregation through mistranslation in *E. coli* (Kohanski et al., 2008). STED  
164 imaging revealed that kanamycin-induced aggregates were smaller than those induced by heat  
165 shock, forming as foci measuring  $127 \pm 39$  nm (Fig. 1C). No aggregation foci were observed  
166 following treatment with the antibiotic fosfomycin, which blocks production of peptidoglycan  
167 precursors, nor for spectinomycin (Fig. 1H), a ribosome-binding aminoglycoside that does not  
168 cause mistranslation (Kohanski et al., 2008).

169 Finally, our reporter strains also allowed us to quantify the induction of *dnaK* expression  
170 following stress exposure by determining the fluorescence intensity per bacterial pixel in  
171 different conditions (Fig. 1I). Exposure to 40°C for one hour induced a four-fold increase in  
172 DnaK levels, while a temperature of 45°C induced a two-fold increase within one hour, which  
173 we confirmed by western blotting (Fig. 1J). Although strong aggregation was present, lower  
174 induction of DnaK at 45°C and following kanamycin treatment is possibly due to lower  
175 translation capacity in these conditions (Chen et al., 2017). Treatment with fosfomycin or  
176 spectinomycin did not increase DnaK levels, indicating that the inhibitory effects of these  
177 antibiotics act independently of protein aggregation and the heat shock response in *C.*  
178 *crescentus* (Fig. 1I, J). Altogether, these data establish that protein aggregation occurs at  
179 multiple sites in *C. crescentus* and that the major chaperones DnaK and ClpB are recruited to  
180 these sites.

181

## 182 **Proteins governing diverse processes comprise aggregate foci in *C. crescentus*.**

183 Having established a system for visualizing total cellular aggregation, we next asked  
184 what proteins might be un- or misfolding, thereby recruiting DnaK to foci of aggregation. In  
185 order to address this question, we isolated insoluble detergent-resistant proteins from wild type

186 *C. crescentus* grown at 30°C or exposed to a stress temperature of 45°C for 1 hour, subjected  
187 them to mass spectrometry, and identified 133 proteins enriched specifically in the aggregated  
188 fraction during heat stress (Fig. 2A, Supporting Information Tab. 2). Comparing the abundance  
189 of aggregate-enriched proteins sorted by functional category (Fig. 2B), showed that proteins  
190 belonging to various cellular processes become associated with the aggregate foci, including  
191 54 essential proteins (Supporting Information Tab. 2). The most abundant protein in the  
192 aggregated fraction was sHSP1, which shares 54% and 40% amino acid sequence homology  
193 with the *E. coli* small heat shock proteins IbpA and IbpB, respectively. This result is consistent  
194 with a previously described role of small heat shock proteins in binding and maintaining un- or  
195 misfolded proteins in a disaggregation-ready state (Lindner et al., 2008; Mogk et al., 2003a;  
196 Strozecka et al., 2012).

197 To verify the identity of aggregated proteins detected by mass spectrometry, we selected  
198 the proteins GyrB, FusA, and the predicted homocysteinase CCNA\_00257 to monitor their  
199 subcellular localization when exposed to heat and kanamycin stress (Fig. 2C). All three proteins  
200 were confirmed to condense into aggregate foci colocalizing with DnaK when exposed to stress  
201 (Fig. 2C). Interestingly, in contrast to GyrB, which relocalized in the majority of cells during  
202 all exposures, the number of cells with CCNA\_00257 and FusA aggregates differed depending  
203 on the stress signal (Fig. 2D). While heat stress induced foci formation by CCNA\_00257 in  
204 nearly all cells, kanamycin treatment resulted in foci formation in only 15% of the population,  
205 indicating that CCNA\_00257 is less sensitive to kanamycin-induced effects than GyrB. FusA  
206 only relocalized into aggregate foci in 20% of the population during heat stress, again indicating  
207 that individual proteins are destabilized by different stress exposures. Collectively our data  
208 show that proteins belonging to diverse cellular processes become members of the aggregate  
209 foci observed in *C. crescentus* and that the composition of aggregates is dependent on the stress  
210 condition.

211

212 **Contribution of major chaperones and proteases to stress resistance and aggregate**  
213 **dissolution.**

214 In order to maintain cellular protein homeostasis, chaperones and proteases forming the  
215 protein quality control machinery must cooperate in protein folding, aggregate resolution, and  
216 degradation of un- and misfolded proteins. Through a series of deletion mutants we probed the  
217 contribution of ClpB, sHSP1, the other small heat shock protein homolog CCNA\_03706  
218 (hereafter referred to as sHSP2), and the protease Lon to aggregate resolution and stress  
219 resistance in *C. crescentus*.

220 In accordance with low expression during normal growth temperature, deletion of *clpB*,  
221 *shsp1*, and *shsp2* had no discernible effect at 30°C (Fig. 3A, B). Upon heat stress, the viability  
222 of cells lacking ClpB was drastically reduced, as has been demonstrated previously (Simão et  
223 al., 2005). The number and distribution of DnaK foci was similar to that observed in the  
224 presence of ClpB, however even when challenged by a sublethal heat shock cells were still  
225 unable to resolve aggregated protein deposits, which instead persisted over many generations  
226 even after release from stress (Supporting Information Fig. 2). In contrast to this pronounced  
227 phenotype, absence of *shsp1* or *shsp2* alone or in combination had no effect on resistance to  
228 heat treatment (Fig. 3A). The overall pattern of protein aggregation was unchanged in the  
229 absence of the sHSPs, forming still as distributed punctate foci, and aggregates were resolved  
230 within the same time frame as the parental strain (Fig. 3B). Basal levels of DnaK as well as  
231 levels induced by heat stress were similar in the absence of the sHSPs (Fig. 3C), indicating that  
232 additional DnaK is not compensating for the activity of these proteins and that although sHSP1  
233 comprises nearly half of the aggregated protein fraction, both sHSPs are largely dispensable for  
234 tolerating acute heat stress under the stress conditions tested.

235 Proteases support foldases in maintaining protein homeostasis by degrading un- or  
236 misfolded proteins, and combined loss of proteases has been shown to induce strong defects in  
237 protein quality control (Kanemori et al., 1997). Lon is generally viewed as the major protein  
238 quality control protease in *E. coli* (Rosen et al., 2002; Van Melderen and Aertsen, 2009), and  
239 has a role in cell cycle control and responding to unfolded protein in *C. crescentus* (Jonas et al.,  
240 2013). Cells lacking Lon exhibited only slight reduction in viability during heat stress (Fig.  
241 3A), and both *dnaK-mVenus* induction and the pattern of aggregation occurred as when Lon  
242 was present. Additionally, in the absence of Lon cells were able to completely dissolve protein  
243 aggregates within a similar time frame as the parental strain (Fig. 3B, C). Thus, the Lon protease  
244 is not required for resolving protein aggregation under these stress conditions.

245 Together our data demonstrate that clustering of protein aggregation into several smaller  
246 foci and the recruitment of DnaK to these sites does not depend on other heat shock proteins.  
247 Furthermore, our data confirm in *C. crescentus* that resolution of protein aggregates requires  
248 the disaggregase ClpB and the chaperone DnaK, and that despite the heat shock induction of  
249 sHSPs and Lon, these factors are dispensable under the conditions tested.

250

### 251 **Aggregate clearance through dissolution or dilution is dictated by stress severity**

252 As we have identified aggregate composition as well as chaperone contributions to  
253 aggregate dissolution, we next wanted to determine how *C. crescentus* responds to protein  
254 aggregation provoked by different stress intensities and how aggregates are cleared following  
255 shift to non-stress conditions. We therefore used fluorescence time-lapse microscopy to follow  
256 aggregate formation and resolution dynamics during different stress exposures.

257 To analyze the formation of aggregates following a temperature upshift, we transferred  
258 cultures grown at the normal temperature of 30°C to agarose pads and placed them into the  
259 imaging system pre-heated to either 30, 40, or 44°C, and monitored the localization pattern of

260 DnaK-mVenus as a proxy for aggregate formation over time (Fig. 4A). Under both heat shock  
261 conditions, we observed rapid formation of an average of 3.7 aggregates per cell within 10 min  
262 of heat exposure (Fig. 4A, B, Supporting Information Movie 1). During incubation at 40°C,  
263 cells grew into microcolonies which increased in area at a rate similar to those in non-stress  
264 conditions, and aggregate formation and dissolution appeared highly dynamic (Fig. 4B, C).  
265 After their initial appearance the foci number per cell was quickly reduced until reaching a  
266 plateau of approximately one aggregate per cell by approximately two hours. We observed that  
267 the lifespan of most aggregates was less than 10 min (Fig. 4D). Only 23% of aggregates  
268 persisted for more than two hours (Fig. 4D), demonstrating that the aggregate numbers  
269 following two hours of exposure to 40°C represent a steady state of formation and  
270 disappearance of mostly short-lived aggregates as cells grow, with a minority of persistent  
271 aggregates emerging. We attribute the initial net reduction of aggregate number per cell (Fig.  
272 4B) to continued growth and division and rapid induction of heat shock gene expression, which  
273 allows cells a greater capacity to cope with higher amounts of unfolded protein present at the  
274 new elevated temperature (Fig. 4E).

275         Although microcolonies grew at a relatively normal rate, we observed that temperatures  
276 near 40°C resulted in abnormal filamentous growth phenotypes, indicative of cell division  
277 defects (Fig. 4F), consistent with an earlier study (Heinrich et al., 2016). At a temperature of  
278 44°C cell growth was essentially arrested (Fig. 4A, C) while DnaK-mVenus levels drastically  
279 increased over time, indicating strong and persistent induction of heat shock gene expression  
280 (Fig. 4E). We observed that DnaK foci slowly dissolved until only 40% remained after 6 to 8  
281 hours of exposure to 44°C, and only rarely observed the formation of new aggregates at this  
282 temperature (Fig. 4B, G). This observation indicates that a fraction of aggregates can be  
283 resolved by the highly abundant chaperones, or that DnaK is released from persistent aggregates  
284 under this severe continuous stress.

285 To monitor the resolution of aggregates as cells recovered from heat stress, we exposed  
286 cells growing in liquid culture to 40, 42, 44 or 46°C for one hour, followed by transfer to agarose  
287 pads for imaging at 30°C (Fig. 5A, Supporting Information Fig. 3). During recovery from these  
288 temperatures some or all of the stress-treated population remained capable of resuming growth  
289 (Fig. 5B) and reducing the average number of aggregates per cell (Fig. 5C). How quickly the  
290 average number of aggregates was reduced and whether this was accomplished by aggregate  
291 dissolution or dilution within a growing microcolony was dependent on the severity of the heat  
292 stress. Growth resumption and aggregate reduction were equally fast in cells exposed to 40 and  
293 42°C (Fig. 5B, C), where all protein aggregates were completely dissolved within one hour  
294 (Fig. 5C), leading to aggregate-free microcolonies (Fig. 5A, D). In contrast, cells recuperating  
295 from exposure to 46°C showed a strong growth delay and decreased ability to clear aggregates,  
296 and were heterogenous both in aggregate resolution and the ability to produce normally growing  
297 progeny (Fig. 5A, B, D, E). Only 25% of cells were able to produce microcolonies of normally  
298 sized progeny (Fig. 5D), in which the average aggregate number per cell was notably reduced  
299 (Fig. 5C, E). The remaining 75% of the population were either unable to resume growth within  
300 4.5 hours (32%) or resumed growth with varying degrees of division defects (43%) (Fig. 5D).  
301 Importantly, although most individuals within the forming microcolonies became eventually  
302 aggregation-free, a fraction of offspring maintained aggregates. Many of these aggregates  
303 originated from the heat exposed mother cell and persisted for the duration of imaging.  
304 However, we also observed that a fraction of new shorter-lived aggregates formed during  
305 recovery (Fig. 5F). Based on these analyses we conclude that a portion of aggregates formed  
306 during 46°C exposure persist over several generations and are cleared from individual cells  
307 mainly through dilution within the microcolony rather than dissolution. A similar behavior was  
308 also observed after exposure to 40°C for 10 min in the  $\Delta clpB$  strain, where despite efficient

309 clearance of aggregates from individual cells, all aggregates were long-lived (Supporting  
310 Information Fig. 2).

311 When monitoring the recovery of cells following exposure to 44°C we again observed  
312 that aggregates are cleared through a combination of dissolution and dilution (Supporting  
313 Information Fig. 4). However, in contrast to the 46°C condition, the fraction of cells able to  
314 produce normally sized progeny was larger (77%) (Fig. 5F), cells resumed growth earlier (Fig.  
315 5B) and nearly all cells were free of protein aggregates by 4.5 hours after exposure (Fig. 5C).

316 Taken together our results demonstrate that the severity of heat stress determines the  
317 way by which aggregates are cleared from the cell. Following exposure to moderate stress,  
318 virtually all aggregates are rapidly dissolved by the protein quality control machinery. By  
319 contrast, aggregate clearance following severe stress depends more on dilution during cell  
320 division. Consequently, an inability to resume growth and cell division following such severe  
321 stress prevents successful aggregate clearance.

322

### 323 **The aggregate load does not sort to swarmer or stalked daughter cells in *C. crescentus*.**

324 Asymmetric inheritance of protein aggregates has been proposed to underpin the  
325 senescence of aggregate retaining cells and the rejuvenation of aggregate free cells (Ackermann  
326 et al., 2003; Coelho et al., 2014; Lindner et al., 2008; Shapiro et al., 2002; Winkler et al., 2010).  
327 While asymmetric inheritance in *E. coli* and *Mycobacteria* takes place through collection of  
328 aggregates at the poles, in budding yeast asymmetric inheritance is achieved through retention  
329 in the much larger mother cell. Since *C. crescentus* has a pre-programmed asymmetric division  
330 cycle yielding a bigger stalked/old pole and a smaller swarmer/new pole cell, we sought to  
331 understand how persistent aggregates are inherited in this organism.

332 To study aggregate inheritance when only dilution can be used as a means of aggregate  
333 clearance, we made use of the  $\Delta clpB$  background to investigate the distribution of aggregates

334 following division. A short heat shock of 10 minutes at 40°C induced formation of persistent  
335 protein aggregates in this strain that were distributed throughout the cell volume, while the  
336 ability to grow and divide was preserved (Supporting Information Fig. 2), therefore we followed  
337 the inheritance of these aggregates over consecutive cell divisions by time lapse microscopy  
338 (Fig. 6A). A kymograph normalized to the summed length of all descendants from one  
339 individual cell shows that aggregates are relatively static and rarely change their cellular  
340 position between two cell division events (Fig. 6B). However, establishment of new cell  
341 boundaries as a consequence of cell division affected the relative cellular position of aggregates;  
342 for example, an aggregate located at midcell of a stalked cell becomes located closer to the new  
343 pole in the daughter cell following division (Fig. 6A, B). To analyze the positional change of  
344 aggregates more quantitatively, we determined the frequency by which aggregates obtain a new  
345 cellular position in the daughter stalked cell after cell division, as a function of their original  
346 cellular position (Fig. 6C, Supporting Information Fig. 5). Consistent with the kymograph  
347 analysis, these data show that aggregates located at midcell in the mother cell were likely to  
348 change relative position (71%) during cell division to become closer to the new pole of the  
349 stalked daughter cell. Aggregates between the old pole and midcell (classified as old pole half)  
350 either maintained their original relative position (64%) or also obtained a new relative position  
351 close to the new pole (34%). By contrast, aggregates located at the pole of the mother cell  
352 generally maintained their position during cell division (90%) and changed to a position closer  
353 to the new pole in only 10% of cases. Importantly, we only very rarely observed that aggregates  
354 located outside pole regions became situated closer to the old pole as a consequence of cell  
355 division (2% and 3% of those in the old pole half or at midcell, respectively), indicating that  
356 essentially all aggregates that obtain a new relative position in the daughter stalked cell after  
357 division, are situated closer to the new pole. We explain this passive “movement” of aggregates  
358 towards the new pole with the growth mode of *C. crescentus*, in which cells grow along the cell



359 length, excluding the poles (Aaron et al., 2007; Lambert et al., 2018). Consequently, the fraction  
360 of aggregates originally formed at the poles will remain there over generations due to the  
361 absence of cell elongation in this area. Therefore, the majority of aggregates, while static, are  
362 displaced in proportion to the elongation of the cell and maintain their relative position until a  
363 division event sets new cellular boundaries (Fig. 6D).

364 The result that cell growth and the establishment of new cell boundaries during division  
365 frequently resulted in aggregates becoming closer to the new pole suggested that with  
366 consecutive divisions, these aggregates would eventually be inherited by a swarmer cell.  
367 Consistent with this hypothesis, we found that the cellular position in the mother cell largely  
368 determines to which daughter cell aggregates are distributed (Fig. 6E). Nearly all aggregates at  
369 the new pole or in the new pole half were inherited by the daughter swarmer cell, while  
370 essentially all aggregates at the stalked pole or in the old pole half were inherited by the  
371 daughter stalked cell (Fig. 6E). Aggregates with an original location around midcell were either  
372 inherited by the daughter stalked (74%) or swarmer (26%) cells. The preference towards the  
373 stalked cell may be attributable to the size difference between stalked and swarmer cells (Fig.  
374 6F).

375 In sum, our data show that the cellular positioning of aggregates in *C. crescentus* is  
376 largely governed by the elongation of the cell and the placement of the division plane, and that  
377 the cellular position of aggregates in a mother cell determines the likelihood of being inherited  
378 by a particular cell type. As such, it is unlikely that *C. crescentus* accumulates aggregates in the  
379 old pole-inheriting daughter cell, as previously shown for *E. coli* and *Mycobacterium* (Lindner  
380 et al., 2008; Vaubourgeix et al., 2015; Winkler et al., 2010). To test this idea more directly, we  
381 determined the percentage of total aggregates that are distributed to either the old pole-  
382 inheriting stalked or the new pole-inheriting swarmer cell through five division events.  
383 Consistently, we found that the fraction of aggregates inherited by either cell type was stable

384 (Fig. 6G). Likewise, the fraction of polar aggregates remained stable at approximately 30%  
385 over multiple generations (Fig. 6H). Stalked cells always inherited more aggregates than  
386 swarmer cells (70%) (Fig. 6G), which we attribute to the size difference and the observation  
387 that it is the stalked cell that inherits the old pole (Fig. 6C, F).

388 Collectively, our data show that persistent protein aggregates in *C. crescentus* are  
389 neither collected at the old pole nor asymmetrically distributed to only the stalked cell; rather,  
390 both daughter cells inherit aggregates at a constant ratio. In addition to our analysis of the  $\Delta clpB$   
391 background, we also investigated how persistent aggregates (Fig. 4D) are inherited in wild type  
392 cells during sustained stress at 40°C and during recovery from 44°C (Supporting Information  
393 Fig. 6, 7). These experiments yielded similar results to that obtained in the  $\Delta clpB$  strain (Fig.  
394 6), confirming that under these conditions *C. crescentus* does not rely on asymmetric  
395 inheritance of protein aggregates towards one cell type.

## 396 **Discussion**

397 Our study describes the dynamics of protein aggregate formation and clearance in response to  
398 antibiotic and heat stress in the asymmetrically dividing bacterium *C. crescentus*. We find that  
399 while utilizing the same key players for aggregate clearance as other bacteria, how aggregates  
400 form in *C. crescentus* and how they are partitioned during division differs from previously  
401 described bacteria.

402

### 403 **Subcellular localization of aggregate clusters**

404 We demonstrate that multiple foci of protein aggregation form in *C. crescentus*  
405 throughout the cell volume in response to both antibiotic and heat stress. In *Mycobacterium*  
406 protein aggregates also form as multiple distributed foci, although these are collected at the cell  
407 pole within one doubling time to form a pattern similar to that of *E. coli*, where aggregates  
408 rapidly localize at the poles after formation (Coquel et al., 2013; Lindner et al., 2008). In *E.*  
409 *coli*, it has been demonstrated that the condensed nucleoid governs collection of bigger  
410 aggregates through macromolecular crowding, enforcing movement towards and deposition at  
411 the poles (Coquel et al., 2013; Winkler et al., 2010). Compared to *E. coli* (Winkler et al., 2010),  
412 *C. crescentus* shows a more relaxed arrangement of the chromosome, where the nucleoid fills  
413 the entire cell volume (Fig. 1G). We suspect that this pattern might allow aggregate deposition  
414 throughout the entirety of the cell as opposed to only at the poles. Other large subcellular  
415 structures, such as polyphosphate granules, have been demonstrated to occupy particular  
416 locations within the cell (Henry and Crosson, 2013), however our analysis did not reveal that  
417 aggregates were more or less associated with particular cellular positions.

418 As cells begin to grow, whether in the presence of constant sublethal stress or during  
419 recovery from acute heat shock, we found that the majority of persistent aggregates, while  
420 static, are displaced in proportion to the elongation of the cell. We demonstrate that this

421 displacement is continuous, although cell division may dictate a new relative position within  
422 the daughter cell. As heat shock-induced aggregates are very large and can nearly span the  
423 entire width of the cell, we expect that these may be resistant to movement within the cell, and  
424 would be largely unaffected by the movement of smaller, more mobile cellular components.  
425 Alternatively, the incorporation of un- or misfolded membrane anchored proteins into aggregate  
426 clusters may restrict intracellular movement, as has been demonstrated in *E. coli* when  
427 aggregation-prone luciferase attached to a membrane anchor is expressed (Winkler et al., 2010).  
428 In support of this latter hypothesis, we detected several membrane-associated cellular proteins  
429 to be enriched in the aggregate fraction during severe heat stress, suggesting a potential means  
430 of “tethering” the aggregate and restricting its diffusion throughout the cell.

431

### 432 **Aggregate clearance in response to different stress intensities**

433 While the pattern of aggregate formation in *C. crescentus* was similar throughout all  
434 tested stress conditions, we found that the mechanisms by which aggregates are removed from  
435 individual cells largely depend on the type and intensity of stress. When recovering from  
436 exposure to sublethal stress, aggregates are rapidly dissolved by the combined activity of DnaK  
437 and ClpB resulting in complete aggregate clearance from the population within one generation.  
438 Furthermore, we found that *C. crescentus* is able to cope with continuous exposure to 40°C by  
439 rapidly upregulating the heat shock response following temperature upshift, leading to a new  
440 homeostasis of aggregate formation and dissolution, with more persistent aggregates being  
441 diluted through continuous cell growth. Noticeably, although cells incubated at 40°C grow at a  
442 similar rate as unstressed cells, they become elongated, indicating defects or delays in  
443 completing the cell cycle. A previous study showed that the cell cycle regulator CtrA is  
444 downregulated under this condition (Heinrich et al., 2016).

445 Our data show that when *C. crescentus* is subjected to intense stress, the persistent  
446 aggregates that form cannot be dissolved by the major chaperones, indicating that under these  
447 conditions the capacity of the protein quality control machinery is exhausted. The only way to  
448 reduce these persistent aggregates in individual cells is to distribute them during the process of  
449 cell division. Consequently, only growing and dividing cells can remove persistent aggregates,  
450 while those cells that arrest growth maintain them. Our data demonstrate that exposure to severe  
451 stress is associated with a marked heterogeneity in the ability to return to normal growth, with  
452 only a fraction of the population returning to normal growth following release to non-stress  
453 conditions. We expect that massive aggregation under severe stress causes disruption of  
454 numerous essential growth processes, supported by previous studies which indicate that strong  
455 heat shock response induction during the severe unfolding stress of high temperatures directs  
456 cellular resources away from protein translation to survival functions (Chen et al., 2017; Santra  
457 et al., 2017; Schramm et al., 2017).

458

#### 459 **Pattern of aggregate inheritance and its physiological consequences**

460 Our finding that persistent aggregates do not accumulate in the stalked cell, but are  
461 instead distributed to both daughter cells at a stable ratio, unveils that the pattern of aggregate  
462 inheritance strikingly differs between *C. crescentus* and the previously studied bacteria *E. coli*  
463 and *Mycobacterium*. In the latter cases, aggregates are retained only in the old pole-inheriting  
464 daughter cell, whereas the daughter cell inheriting the new pole escapes inheritance of  
465 aggregate foci (Govers et al., 2018; Lindner et al., 2008; Vaubourgeix et al., 2015; Vedel et al.,  
466 2016; Winkler et al., 2010). The resulting heterogeneity of growing microcolonies, in which  
467 one part of the population carries protein aggregates while the other part does not, has been  
468 suggested to provide a benefit for the population, either by providing a source of rejuvenation

469 (Lindner et al., 2008; Winkler et al., 2010) or by increasing robustness to subsequent stresses  
470 (Govers et al., 2018).

471 An asymmetric pattern of aggregate inheritance has been a plausible, though untested,  
472 explanation for the previous observation that *Caulobacter* stalked cells decrease reproductive  
473 output with increasing cell age (Ackermann et al., 2003). While a minority of aggregates were  
474 trapped at the poles in *Caulobacter*, additional aggregates did not accumulate at this location,  
475 with the majority of cells instead eventually passing their aggregate content on to swarmer cells.  
476 Our findings suggest that rather other reasons, for example retention of older membrane  
477 components (Bergmiller et al., 2017), may underlie the phenomenon of stalked cell senescence.

478 Taken together, our work has revealed for the first time a shared mode of aggregate  
479 inheritance in bacteria, highlighting that asymmetric aggregate inheritance is not the sole way  
480 of managing protein aggregation. If *C. crescentus* benefits from the observed slow distribution  
481 of persistent aggregates to both daughter cell types is unclear. However, it may be advantageous  
482 to preserve both cell types in the population rather than sacrifice one type for the other in the  
483 ever-changing aquatic habitat of this bacterium.

## 484 **Materials and Methods**

### 485 **Growth conditions**

486 *C. crescentus* strains were routinely grown at 30°C in liquid PYE medium in either an  
487 Infors HT Multitron Standard or Infors HT Ecotron rotating shaker set to 200 rpm, or on solid  
488 PYE agar. Prior to analysis, all liquid cultures were grown undisturbed in exponential phase at  
489 30 °C for three hours to allow any aggregation from other sources to be resolved or diluted.  
490 Heat shock experiments were performed by moving 100 ml flasks of 10 ml cultures growing at  
491 30°C to a shaking incubator pre-heated to the desired temperature. Media were supplemented  
492 with the following additives when indicated; xylose 0.3 %, vanillate 500 µM. Antibiotics were  
493 used at following concentration (concentration in liquid/solid media as µg/mL): kanamycin 5  
494 (2.5 in the case of KJ956 and KJ957)/25, spectinomycin 25/400, gentamycin 0.625/5,  
495 tetracycline 1/2, rifampicin 2.5/5. Experiments were generally performed in the absence of  
496 antibiotic when using strains in which the resistance cassette was integrated into the  
497 chromosome. *E. coli* strains for cloning purposes were grown in LB medium at 37°C,  
498 supplemented with antibiotics at following concentrations: kanamycin 30/50, spectinomycin  
499 50/50, gentamycin 15/20, tetracycline 12/12, rifampicin 25/50. Details on strain and plasmid  
500 construction are reported in Supporting Information Text 1 and Supporting Information Tab. 1.

501

### 502 **Microscopy**

503 To visualize cells, a 1% agarose in PYE slab was poured using a GeneFrame (Thermo  
504 Fisher Scientific) attached to a glass slide and coverslip, which was pre-warmed to 30°C prior  
505 to all experiments. At the indicated time points, a small volume of live cultures was transferred  
506 to the pad, sealed under a coverslip and transferred to the microscope for immediate  
507 visualization. A Ti eclipse inverted research microscope with 100x/1.45 NA objective housed  
508 in a heated chamber, pre-heated to 30°C unless otherwise specified, was used to collect images.

509 Fluorescence images were captured using excitation and emission filter cubes for mVenus  
510 (YFP), mCerulean (CFP), Hoechst 33258 (DAPI), and mCherry (Texas Red), ensuring that  
511 fluorescence levels did not exceed the dynamic range of the sensor.

512 To visualize the chromosome, cultures of *Caulobacter* were fixed using a final  
513 concentration of 4% formaldehyde for 5 min, following which DNA was stained for 25 min  
514 using Hoechst 33258 at a final concentration of 2  $\mu\text{g}/\text{mL}$ . Fixed cells were transferred to a 1%  
515 agarose pad and visualized under the microscope as described above for live cells.

516

### 517 **Custom-built STED set-up and STED imaging**

518 The super-resolution imaging has been performed at a custom-built STED set-up. The  
519 samples were fixed and adhered to slides as described by (Hiraga et al., 1998), and labelled  
520 with an anti-GFP nanobody coupled to ATTO 594 (GFP-Booster\_Atto594, ChromoTek). The  
521 dye was excited with a 561 nm pulsed diode laser (PDL561, Abberior Instruments) and  
522 subsequently depleted with a 775 nm pulsed laser (KATANA 08 HP, OneFive), both operating  
523 at 40 MHz. The depletion beam was shaped to a donut in the focal plane by the use of a spatial  
524 light modulator (LCOS-SLM X10468-02, Hamamatsu Photonics). The excitation laser and  
525 depletion laser were coupled together and scanned over the sample using fast galvanometer  
526 mirrors (galvanometer mirrors 6215H + servo driver 71215HHJ 671, Cambridge Technology).  
527 The laser beams were focused onto the sample using a HC PL APO 100x/1.40 Oil STED White  
528 objective lens (15506378, Leica Microsystems), through which also the fluorescence signal was  
529 collected. After de-scanning and de-coupling of the fluorescence signal, it was put through a  
530 confocal pinhole (1.28 Airy disk units) and detected through a bandpass filter (ET615/30m,  
531 Chroma Technology) and a notch filter (ZET785NF, Chroma Technology) with a fiber-coupled  
532 APD (SPCM-AQRH-14-FC, PerkinElmer).



533           The imaging was done with a 561 nm excitation laser power of 1.1-8.4  $\mu$ W and a 775  
534 nm depletion laser power of 132-158 mW, both measured at the first conjugate back focal plane  
535 of the objective. The pixel size for all images was set to 25 nm. Each image was acquired by  
536 adding up 10 line scans for each line, each with a pixel dwell time of 20  $\mu$ s, resulting in a total  
537 pixel dwell time of 200  $\mu$ s.

538

### 539 **Aggregate size analysis**

540           The aggregate sizes were calculated from groups of fitted line profiles in the STED and  
541 confocal images. Using Fiji (ImageJ), aggregates were picked out and line profiles were drawn  
542 across them. The line profiles were extracted and fitted with a Lorentzian function, from which  
543 the full width at half maximum was extracted as the aggregate size. The number of aggregates  
544 used for each mean and standard deviation calculation was at least 60.

545

### 546 **Image and statistical analysis**

547           To prepare the appropriate image formats and to perform basic analyses such as foci  
548 enumeration and generation of line profiles, the Fiji software package was used. Information  
549 on the area of individual cells, their fluorescence intensity, as well as their corresponding  
550 aggregate number and position in Figure 1D, E, 4, 5 and Supplemental Information Fig. 2 and  
551 4 were gathered by analyzing binary masks of cells and aggregate foci using the ImageJ package  
552 MicrobeJ (Ducret et al., 2016). The Oufiti software package (Paintdakhi et al., 2016) was used  
553 to generate data on population cell lengths in Figure 4F. To determine fluorescence intensity  
554 per bacterial pixel shown in Figure 1I and 3C, the MATLAB package SuperSegger (Stylianidou  
555 et al., 2016) was used to perform segmentation on images followed by calculation of total cell  
556 area per image and bacterial fluorescence intensity per image. For the preparation of cell masks,  
557 bacterial segmentation was performed on phase contrast images using SuperSegger and all

558 segmentation was manually checked before further analysis. Masks of the aggregate signal were  
559 manually prepared by labeling corresponding areas. The colony kymograph in Figure 6B was  
560 prepared based on cell and aggregate masks using SuperSegger to generate cell linking, cell  
561 length, and aggregate position measurements. Aggregate inheritance and positional changes  
562 after sequential divisions (Fig. 6, Supplemental Information Fig. 5, 6, 7) as well as the aggregate  
563 life span (Fig. 4D, G, 5F, Supplemental Information Fig. 4B) were manually tracked. Data sets  
564 generated through all image analysis programs were analyzed and visualized using MATLAB  
565 and R software packages.

566

### 567 **Immunoblotting**

568 Cell pellets were collected following the indicated treatments and time points and  
569 normalized by units OD<sub>600</sub> through dilution in Laemmli buffer. Diluted samples were boiled at  
570 98°C for 10 min and loaded into Stain Free Tris-glycine gels (Bio-Rad) for separation by SDS-  
571 PAGE and transfer to a nitrocellulose membrane as per manufacturer guidelines. Membranes  
572 were blocked for 1 h in 5% skim milk powder in TBST and protein levels were detected using  
573 either anti-DnaK antibody (Schramm et al., 2017) or the anti-GFP antibody (Thermo Fisher  
574 Scientific, #A-11122). A secondary anti-rabbit HRP-conjugated antibody was used to detect  
575 primary antibody binding, and SuperSignal Femto West (Thermo Fisher Scientific) used to  
576 develop the membrane. Blots were scanned using a Chemidoc (Bio-Rad) system and signal  
577 quantification was performed using the Image Lab software package (Bio-Rad).

578

### 579 **Aggregation assay**

580 The aggregation assay was performed as described in (Schramm et al., 2017). About 40  
581 OD<sub>600</sub> units of cells with an OD<sub>600</sub> between 0.2-0.4 either grown at 30°C or heat stressed were  
582 harvested. For the heat treatment an exponential overnight culture grown at 30°C was pelleted

583 (6000 g, 10 min, RT), resuspended in a flask containing 45°C pre-warmed medium and then  
584 incubated shaking at the same temperature for 1 h. A portion of the aggregate fraction was  
585 subjected to SDS-PAGE and the separated proteins were visualized by Coomassie staining  
586 (Instant Blue Protein Stain, Expedeon).

587

## 588 **Proteomic analysis of protein aggregates**

589 For the identification of endogenous aggregating and aggregate associated proteins in  
590 *Caulobacter crescentus* whole protein aggregate fractions were subjected to mass spectrometry  
591 analysis. 0.1 µg horse cytochrome C were added to each sample to serve as internal protein  
592 abundance standard. The mass spectrometry analysis of the samples was performed using an  
593 Orbitrap Velos Pro mass spectrometer (Thermo Scientific). An Ultimate nanoRSLC-HPLC  
594 system (Dionex), equipped with a custom 20 cm x 75 µm C18 RP column filled with 1.7 µm  
595 beads was connected online to the mass spectrometer through a Proxeon nanospray source. 1-  
596 15 µL of the tryptic digest (depending on sample concentration) were injected onto a C18 pre-  
597 concentration column. Automated trapping and desalting of the sample was performed at a  
598 flowrate of 6 µL/min using water/0.05% formic acid as solvent. Separation of the tryptic  
599 peptides was achieved with the following gradient of water/0.05% formic acid (solvent A) and  
600 80% acetonitrile/0.045% formic acid (solvent B) at a flow rate of 300 nL/min: holding 4% B  
601 for five minutes, followed by a linear gradient to 45% B within 30 minutes and linear increase  
602 to 95% solvent B in additional 5 minutes. The column was connected to a stainless steel  
603 nanoemitter (Proxeon, Denmark) and the eluent was sprayed directly towards the heated  
604 capillary of the mass spectrometer using a potential of 2300 V. A survey scan with a resolution  
605 of 60000 within the Orbitrap mass analyzer was combined with at least three data-dependent  
606 MS/MS scans with dynamic exclusion for 30 s either using CID with the linear ion-trap or using  
607 HCD combined with orbitrap detection at a resolution of 7500. Data analysis was performed

608 using Proteome Discoverer (Thermo Scientific) with SEQUEST search engine using Uniprot  
609 databases. The peptide peak areas of each protein in a sample were normalized to that of the  
610 internal Cytochrome C standard. Proteins were considered to be specifically enriched in the  
611 aggregate fraction if they were only detected in the heat-treated sample or more abundant than  
612 in the control.

613

#### 614 **Spot colony formation assays**

615 Cultures with an OD<sub>600</sub> between 0.1-0.4 were diluted to 0.05 after which a 1:10 serial  
616 dilution was performed. 2  $\mu$ L of each dilution were spotted on PYE agar plates.

## 617 **Acknowledgements**

618 We thank Dr. Claes Andréasson and members of the Jonas lab for helpful discussion. We also  
619 thank Dr. Uwe Linne and the mass spectrometry facility at the University of Marburg for their  
620 assistance. The study was financially supported by funding from the LOEWE program of the  
621 state Hessen, funding of Strategic Research Areas (SFO) from Stockholm University, and a  
622 future research leaders grant from the Swedish Foundation for Strategic Research (SSF).

## 623 **References**

- 624 Aaron M, Charbon G, Lam H, Schwarz H, Vollmer W, Jacobs-Wagner C. 2007. The tubulin  
625 homologue FtsZ contributes to cell elongation by guiding cell wall precursor synthesis  
626 in *Caulobacter crescentus*. *Mol Microbiol* **64**:938–952. doi:10.1111/j.1365-  
627 2958.2007.05720.x
- 628 Ackermann M, Stearns SC, Jenal U. 2003. Senescence in a bacterium with asymmetric  
629 division. *Science* **300**:1920. doi:10.1126/science.1083532
- 630 Aguilaniu H, Gustafsson L, Rigoulet M, Nyström T. 2003. Asymmetric inheritance of  
631 oxidatively damaged proteins during cytokinesis. *Science* **299**:1751–1753.  
632 doi:10.1126/science.1080418
- 633 Baldini RL, Avedissian M, Gomes SL. 1998. The CIRCE element and its putative repressor  
634 control cell cycle expression of the *Caulobacter crescentus* groESL operon. *J Bacteriol*  
635 **180**:1632–1641.
- 636 Barthel TK, Zhang J, Walker GC. 2001. ATPase-Defective Derivatives of *Escherichia coli*  
637 DnaK That Behave Differently with Respect to ATP-Induced Conformational Change  
638 and Peptide Release. *J Bacteriol* **183**:5482–5490. doi:10.1128/JB.183.19.5482-  
639 5490.2001
- 640 Bergmiller T, Andersson AMC, Tomasek K, Balleza E, Kiviet DJ, Hauschild R, Tkačik G,  
641 Guet CC. 2017. Biased partitioning of the multidrug efflux pump AcrAB-TolC  
642 underlies long-lived phenotypic heterogeneity. *Science* **356**:311–315.  
643 doi:10.1126/science.aaf4762
- 644 Chen K, Gao Y, Mih N, O'Brien EJ, Yang L, Palsson BO. 2017. Thermosensitivity of growth  
645 is determined by chaperone-mediated proteome reallocation. *Proc Natl Acad Sci*  
646 **114**:11548–11553. doi:10.1073/pnas.1705524114

- 647 Coelho M, Lade SJ, Alberti S, Gross T, Tolić IM. 2014. Fusion of Protein Aggregates  
648 Facilitates Asymmetric Damage Segregation. *PLoS Biol* **12**:e1001886.  
649 doi:10.1371/journal.pbio.1001886
- 650 Coquel A-S, Jacob J-P, Primet M, Demarez A, Dimiccoli M, Julou T, Moisan L, Lindner AB,  
651 Berry H. 2013. Localization of protein aggregation in Escherichia coli is governed by  
652 diffusion and nucleoid macromolecular crowding effect. *PLoS Comput Biol*  
653 **9**:e1003038. doi:10.1371/journal.pcbi.1003038
- 654 Curtis PD, Brun YV. 2010. Getting in the loop: regulation of development in *Caulobacter*  
655 *crescentus*. *Microbiol Mol Biol Rev MMBR* **74**:13–41. doi:10.1128/MMBR.00040-09
- 656 Da Silva ACA, Simão RCG, Susin MF, Baldini RL, Avedissian M, Gomes SL. 2003.  
657 Downregulation of the heat shock response is independent of DnaK and  $\sigma_{32}$  levels in  
658 *Caulobacter crescentus*: Heat shock response regulation in *Caulobacter*. *Mol Microbiol*  
659 **49**:541–553. doi:10.1046/j.1365-2958.2003.03581.x
- 660 Ducret A, Quardokus EM, Brun YV. 2016. MicrobeJ, a tool for high throughput bacterial cell  
661 detection and quantitative analysis. *Nat Microbiol* **1**:16077.  
662 doi:10.1038/nmicrobiol.2016.77
- 663 Erjavec N, Larsson L, Grantham J, Nyström T. 2007. Accelerated aging and failure to  
664 segregate damaged proteins in Sir2 mutants can be suppressed by overproducing the  
665 protein aggregation-remodeling factor Hsp104p. *Genes Dev* **21**:2410–2421.  
666 doi:10.1101/gad.439307
- 667 Fay A, Glickman MS. 2014. An essential nonredundant role for mycobacterial DnaK in  
668 native protein folding. *PLoS Genet* **10**:e1004516. doi:10.1371/journal.pgen.1004516
- 669 Glover JR, Lindquist S. 1998. Hsp104, Hsp70, and Hsp40. *Cell* **94**:73–82.  
670 doi:10.1016/S0092-8674(00)81223-4

- 671 Goloubinoff P, Mogk A, Zvi APB, Tomoyasu T, Bukau B. 1999. Sequential mechanism of  
672 solubilization and refolding of stable protein aggregates by a bichaperone network.  
673 *Proc Natl Acad Sci* **96**:13732–13737. doi:10.1073/pnas.96.24.13732
- 674 Govers SK, Dutré P, Aertsen A. 2014. In vivo disassembly and reassembly of protein  
675 aggregates in *Escherichia coli*. *J Bacteriol* **196**:2325–2332. doi:10.1128/JB.01549-14
- 676 Govers SK, Mortier J, Adam A, Aertsen A. 2018. Protein aggregates encode epigenetic  
677 memory of stressful encounters in individual *Escherichia coli* cells. *PLoS Biol*  
678 **16**:e2003853. doi:10.1371/journal.pbio.2003853
- 679 Grousl T, Ungelenk S, Miller S, Ho C-T, Khokhrina M, Mayer MP, Bukau B, Mogk A. 2018.  
680 A prion-like domain in Hsp42 drives chaperone-facilitated aggregation of misfolded  
681 proteins. *J Cell Biol* **217**:1269–1285. doi:10.1083/jcb.201708116
- 682 Hartl FU, Bracher A, Hayer-Hartl M. 2011. Molecular chaperones in protein folding and  
683 proteostasis. *Nature* **475**:324–332. doi:10.1038/nature10317
- 684 Heck JW, Cheung SK, Hampton RY. 2010. Cytoplasmic protein quality control degradation  
685 mediated by parallel actions of the E3 ubiquitin ligases Ubr1 and San1. *Proc Natl*  
686 *Acad Sci U S A* **107**:1106–1111. doi:10.1073/pnas.0910591107
- 687 Heinrich K, Sobetzko P, Jonas K. 2016. A Kinase-Phosphatase Switch Transduces  
688 Environmental Information into a Bacterial Cell Cycle Circuit. *PLoS Genet*  
689 **12**:e1006522. doi:10.1371/journal.pgen.1006522
- 690 Henry JT, Crosson S. 2013. Chromosome replication and segregation govern the biogenesis  
691 and inheritance of inorganic polyphosphate granules. *Mol Biol Cell* **24**:3177–3186.  
692 doi:10.1091/mbc.E13-04-0182
- 693 Higuchi R, Vevea JD, Swayne TC, Chojnowski R, Hill V, Boldogh IR, Pon LA. 2013. Actin  
694 dynamics affect mitochondrial quality control and aging in budding yeast. *Curr Biol*  
695 *CB* **23**:2417–2422. doi:10.1016/j.cub.2013.10.022



- 696 Hill SM, Hao X, Grönvall J, Spikings-Nordby S, Widlund PO, Amen T, Jörhov A, Josefson  
697 R, Kaganovich D, Liu B, Nyström T. 2016. Asymmetric Inheritance of Aggregated  
698 Proteins and Age Reset in Yeast Are Regulated by Vac17-Dependent Vacuolar  
699 Functions. *Cell Rep* **16**:826–838. doi:10.1016/j.celrep.2016.06.016
- 700 Hill SM, Hao X, Liu B, Nyström T. 2014. Life-span extension by a metacaspase in the yeast  
701 *Saccharomyces cerevisiae*. *Science* **344**:1389–1392. doi:10.1126/science.1252634
- 702 Hiraga S, Ichinose C, Niki H, Yamazoe M. 1998. Cell cycle-dependent duplication and  
703 bidirectional migration of SeqA-associated DNA-protein complexes in *E. coli*. *Mol*  
704 *Cell* **1**:381–387.
- 705 Jonas K, Liu J, Chien P, Laub MT. 2013. Proteotoxic stress induces a cell-cycle arrest by  
706 stimulating Lon to degrade the replication initiator DnaA. *Cell* **154**:623–636.  
707 doi:10.1016/j.cell.2013.06.034
- 708 Kanemori M, Nishihara K, Yanagi H, Yura T. 1997. Synergistic roles of HslVU and other  
709 ATP-dependent proteases in controlling in vivo turnover of sigma32 and abnormal  
710 proteins in *Escherichia coli*. *J Bacteriol* **179**:7219–7225.
- 711 Kohanski MA, Dwyer DJ, Wierzbowski J, Cottarel G, Collins JJ. 2008. Mistranslation of  
712 Membrane Proteins and Two-Component System Activation Trigger Antibiotic-  
713 Mediated Cell Death. *Cell* **135**:679–690. doi:10.1016/j.cell.2008.09.038
- 714 Kumar M, Sourjik V. 2012. Physical map and dynamics of the chaperone network in  
715 *Escherichia coli*. *Mol Microbiol* **84**:736–747. doi:10.1111/j.1365-2958.2012.08054.x
- 716 Lambert A, Vanhecke A, Archetti A, Holden S, Schaber F, Pincus Z, Laub MT, Goley E,  
717 Manley S. 2018. Constriction rate modulation can drive cell size control and  
718 homeostasis in *C. crescentus*. *iScience*. doi:10.1016/j.isci.2018.05.020

- 719 Lindner AB, Madden R, Demarez A, Stewart EJ, Taddei F. 2008. Asymmetric segregation of  
720 protein aggregates is associated with cellular aging and rejuvenation. *Proc Natl Acad*  
721 *Sci U S A* **105**:3076–3081. doi:10.1073/pnas.0708931105
- 722 Mogk A, Bukau B, Kampinga HH. 2018. Cellular Handling of Protein Aggregates by  
723 Disaggregation Machines. *Mol Cell* **69**:214–226. doi:10.1016/j.molcel.2018.01.004
- 724 Mogk A, Deuerling E, Vorderwülbecke S, Vierling E, Bukau B. 2003a. Small heat shock  
725 proteins, ClpB and the DnaK system form a functional triade in reversing protein  
726 aggregation. *Mol Microbiol* **50**:585–595.
- 727 Mogk A, Schlieker C, Friedrich KL, Schönfeld H-J, Vierling E, Bukau B. 2003b. Refolding  
728 of Substrates Bound to Small Hsps Relies on a Disaggregation Reaction Mediated  
729 Most Efficiently by ClpB/DnaK. *J Biol Chem* **278**:31033–31042.  
730 doi:10.1074/jbc.M303587200
- 731 Nyström T, Liu B. 2014. The mystery of aging and rejuvenation - a budding topic. *Curr Opin*  
732 *Microbiol* **18**:61–67. doi:10.1016/j.mib.2014.02.003
- 733 Paintdakhi A, Parry B, Campos M, Irnov I, Elf J, Surovtsev I, Jacobs-Wagner C. 2016. Oufi:  
734 an integrated software package for high-accuracy, high-throughput quantitative  
735 microscopy analysis. *Mol Microbiol* **99**:767–777. doi:10.1111/mmi.13264
- 736 Rosen R, Biran D, Gur E, Becher D, Hecker M, Ron EZ. 2002. Protein aggregation in  
737 *Escherichia coli*: role of proteases. *FEMS Microbiol Lett* **207**:9–12.
- 738 Saarikangas J, Barral Y. 2015. Protein aggregates are associated with replicative aging  
739 without compromising protein quality control. *eLife* **4**. doi:10.7554/eLife.06197
- 740 Santra M, Dill KA, de Graff AMR. 2018. How Do Chaperones Protect a Cell's Proteins from  
741 Oxidative Damage? *Cell Syst*. doi:10.1016/j.cels.2018.05.001

- 742 Santra M, Farrell DW, Dill KA. 2017. Bacterial proteostasis balances energy and chaperone  
743 utilization efficiently. *Proc Natl Acad Sci* **114**:E2654–E2661.  
744 doi:10.1073/pnas.1620646114
- 745 Schramm FD, Heinrich K, Thüring M, Bernhardt J, Jonas K. 2017. An essential regulatory  
746 function of the DnaK chaperone dictates the decision between proliferation and  
747 maintenance in *Caulobacter crescentus*. *PLOS Genet* **13**:e1007148.  
748 doi:10.1371/journal.pgen.1007148
- 749 Shapiro L, McAdams HH, Losick R. 2002. Generating and exploiting polarity in bacteria.  
750 *Science* **298**:1942–1946. doi:10.1126/science.1072163
- 751 Shcheprova Z, Baldi S, Frei SB, Gonnet G, Barral Y. 2008. A mechanism for asymmetric  
752 segregation of age during yeast budding. *Nature* **454**:728–734.  
753 doi:10.1038/nature07212
- 754 Simão RCG, Susin MF, Alvarez-Martinez CE, Gomes SL. 2005. Cells lacking ClpB display a  
755 prolonged shutoff phase of the heat shock response in *Caulobacter crescentus*:  
756 *Caulobacter crescentus* ClpB. *Mol Microbiol* **57**:592–603. doi:10.1111/j.1365-  
757 2958.2005.04713.x
- 758 Specht S, Miller SBM, Mogk A, Bukau B. 2011. Hsp42 is required for sequestration of  
759 protein aggregates into deposition sites in *Saccharomyces cerevisiae*. *J Cell Biol*  
760 **195**:617–629. doi:10.1083/jcb.201106037
- 761 Spokoini R, Moldavski O, Nahmias Y, England JL, Schuldiner M, Kaganovich D. 2012.  
762 Confinement to organelle-associated inclusion structures mediates asymmetric  
763 inheritance of aggregated protein in budding yeast. *Cell Rep* **2**:738–747.  
764 doi:10.1016/j.celrep.2012.08.024
- 765 Strozecka J, Chrusciel E, Gorna E, Szymanska A, Zietkiewicz S, Liberek K. 2012.  
766 Importance of N- and C-terminal Regions of IbpA, *Escherichia coli* Small Heat Shock

- 767 Protein, for Chaperone Function and Oligomerization. *J Biol Chem* **287**:2843–2853.  
768 doi:10.1074/jbc.M111.273847
- 769 Stylianidou S, Brennan C, Nissen SB, Kuwada NJ, Wiggins PA. 2016. SuperSegger: robust  
770 image segmentation, analysis and lineage tracking of bacterial cells. *Mol Microbiol*  
771 **102**:690–700. doi:10.1111/mmi.13486
- 772 Tomoyasu T, Mogk A, Langen H, Goloubinoff P, Bukau B. 2001. Genetic dissection of the  
773 roles of chaperones and proteases in protein folding and degradation in the *Escherichia*  
774 *coli* cytosol. *Mol Microbiol* **40**:397–413.
- 775 Tyedmers J, Mogk A, Bukau B. 2010. Cellular strategies for controlling protein aggregation.  
776 *Nat Rev Mol Cell Biol* **11**:777–788. doi:10.1038/nrm2993
- 777 Ungelenk S, Moayed F, Ho C-T, Grousl T, Scharf A, Mashaghi A, Tans S, Mayer MP, Mogk  
778 A, Bukau B. 2016. Small heat shock proteins sequester misfolding proteins in near-  
779 native conformation for cellular protection and efficient refolding. *Nat Commun*  
780 **7**:13673. doi:10.1038/ncomms13673
- 781 Van Melderen L, Aertsen A. 2009. Regulation and quality control by Lon-dependent  
782 proteolysis. *Res Microbiol* **160**:645–651. doi:10.1016/j.resmic.2009.08.021
- 783 Vaubourgeix J, Lin G, Dhar N, Chenouard N, Jiang X, Botella H, Lupoli T, Mariani O, Yang  
784 G, Ouerfelli O, Unser M, Schnappinger D, McKinney J, Nathan C. 2015. Stressed  
785 mycobacteria use the chaperone ClpB to sequester irreversibly oxidized proteins  
786 asymmetrically within and between cells. *Cell Host Microbe* **17**:178–190.  
787 doi:10.1016/j.chom.2014.12.008
- 788 Vedel S, Nunns H, Košmrlj A, Semsey S, Trusina A. 2016. Asymmetric Damage Segregation  
789 Constitutes an Emergent Population-Level Stress Response. *Cell Syst* **3**:187–198.  
790 doi:10.1016/j.cels.2016.06.008

- 791 Wallace EWJ, Kear-Scott JL, Pilipenko EV, Schwartz MH, Laskowski PR, Rojek AE,  
792 Katanski CD, Riback JA, Dion MF, Franks AM, Airoidi EM, Pan T, Budnik BA,  
793 Drummond DA. 2015. Reversible, Specific, Active Aggregates of Endogenous  
794 Proteins Assemble upon Heat Stress. *Cell* **162**:1286–1298.  
795 doi:10.1016/j.cell.2015.08.041
- 796 Winkler J, Seybert A, König L, Pruggnaller S, Haselmann U, Sourjik V, Weiss M, Frangakis  
797 AS, Mogk A, Bukau B. 2010. Quantitative and spatio-temporal features of protein  
798 aggregation in Escherichia coli and consequences on protein quality control and  
799 cellular ageing. *EMBO J* **29**:910–923. doi:10.1038/emboj.2009.412
- 800 Wu W, Xing L, Zhou B, Lin Z. 2011. Active protein aggregates induced by terminally  
801 attached self-assembling peptide ELK16 in Escherichia coli. *Microb Cell Factories*  
802 **10**:9. doi:10.1186/1475-2859-10-9
- 803 Zhou C, Slaughter BD, Unruh JR, Eldakak A, Rubinstein B, Li R. 2011. Motility and  
804 segregation of Hsp104-associated protein aggregates in budding yeast. *Cell* **147**:1186–  
805 1196. doi:10.1016/j.cell.2011.11.002
- 806

807 **Figures**

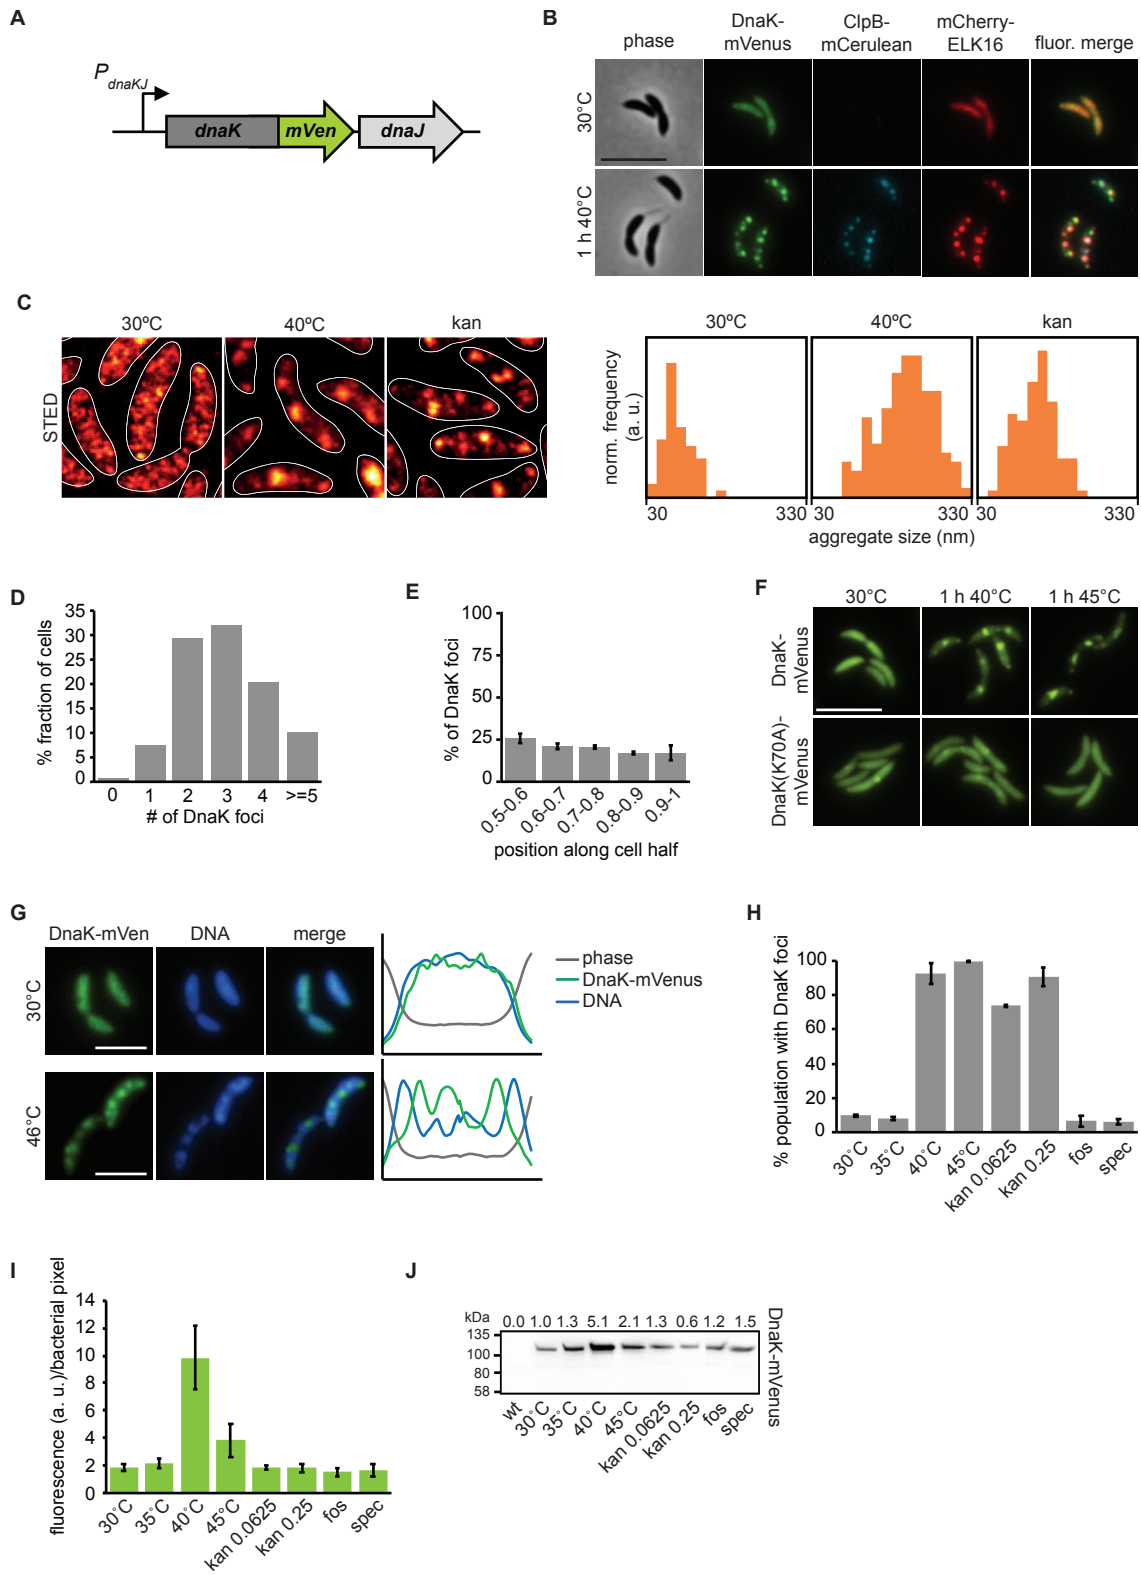

808

809

810 **Figure 1. Stress induces relocalization of chaperone machinery to foci of protein**  
811 **aggregation.**

812 (A) Fluorescent fusions to proteins at their native locus are used to visualize the location of  
813 chaperones. (B) Microscopy of DnaK-mVenus, ClpB-mCerulean, and mCherry-ELK16  
814 expressed at 30°C and after 1 h of heat shock at 40°C. (C) Representative images demonstrating  
815 DnaK-mVenus localization at super-resolution with STED imaging following incubation at  
816 30°C, 1 h at 40°C, and after 1 h treatment with 0.25 µg/ml kanamycin. STED images are  
817 smoothed and cell outlines are shown in white. The histograms show the distribution of  
818 aggregate sizes, with all histograms showing the size range of 30-330 nm, and a bin width of  
819 20 nm. Histograms show the size distribution of at least 60 aggregates. (D) Quantification of  
820 the number of aggregates per cell and (E) graph illustrating the position of the aggregates along  
821 five bins from midcell (0.5) to the cell pole (1) in cells exposed to 1 h of 40°C in liquid culture.  
822 Quantifications in (D) and (E) show the means of biological triplicates for which at least 196  
823 cells and 685 aggregates each were analyzed, respectively. Error bars represent standard  
824 deviations. (F) Microscopy comparing localization of DnaK-mVenus with DnaK70A-mVenus  
825 at 30°C and after 1 h at 40°C. (G) Fluorescence microscopy demonstrating localization of  
826 DnaK-mVenus and the chromosome, stained with Hoechst 33258, after incubation at 30°C and  
827 46°C. Line profiles (right) demonstrate fluorescence or phase contrast signal over the length of  
828 a representative cell from each treatment group. Signals are plotted as the percentage of the  
829 maximum value. Scale bar is 2.5 µm. (H) DnaK-mVenus foci formation in response to different  
830 stress conditions. Cultures of the DnaK-mVenus strain were exposed to the indicated  
831 temperature or treated with 0.0625 µg/ml or 0.25 µg/ml kanamycin, 20 µg/ml fosfomycin (fos),  
832 or 100 µg/ml spectinomycin (spec) for 1 h followed by visualization and quantification of the  
833 number of cells with DnaK-mVenus foci. Quantifications show the means of biological  
834 duplicates where 300 cells each were analyzed. Error bars represent standard deviation. (I)

835 Quantification of DnaK-mVenus fluorescence intensity under different stress conditions.  
836 Cultures of the DnaK-mVenus strain were treated as in (H) followed by imaging and  
837 quantification of fluorescence intensity per bacterial pixel. Quantifications show the means of  
838 biological duplicates where at least 339 total cells each were analyzed from at least 10  
839 independent images. (J) Quantification of protein levels of DnaK-mVenus under the conditions  
840 described in (H) and (I) by western blot. Band intensities are shown as average of two replicates  
841 above the western blot image.  
842



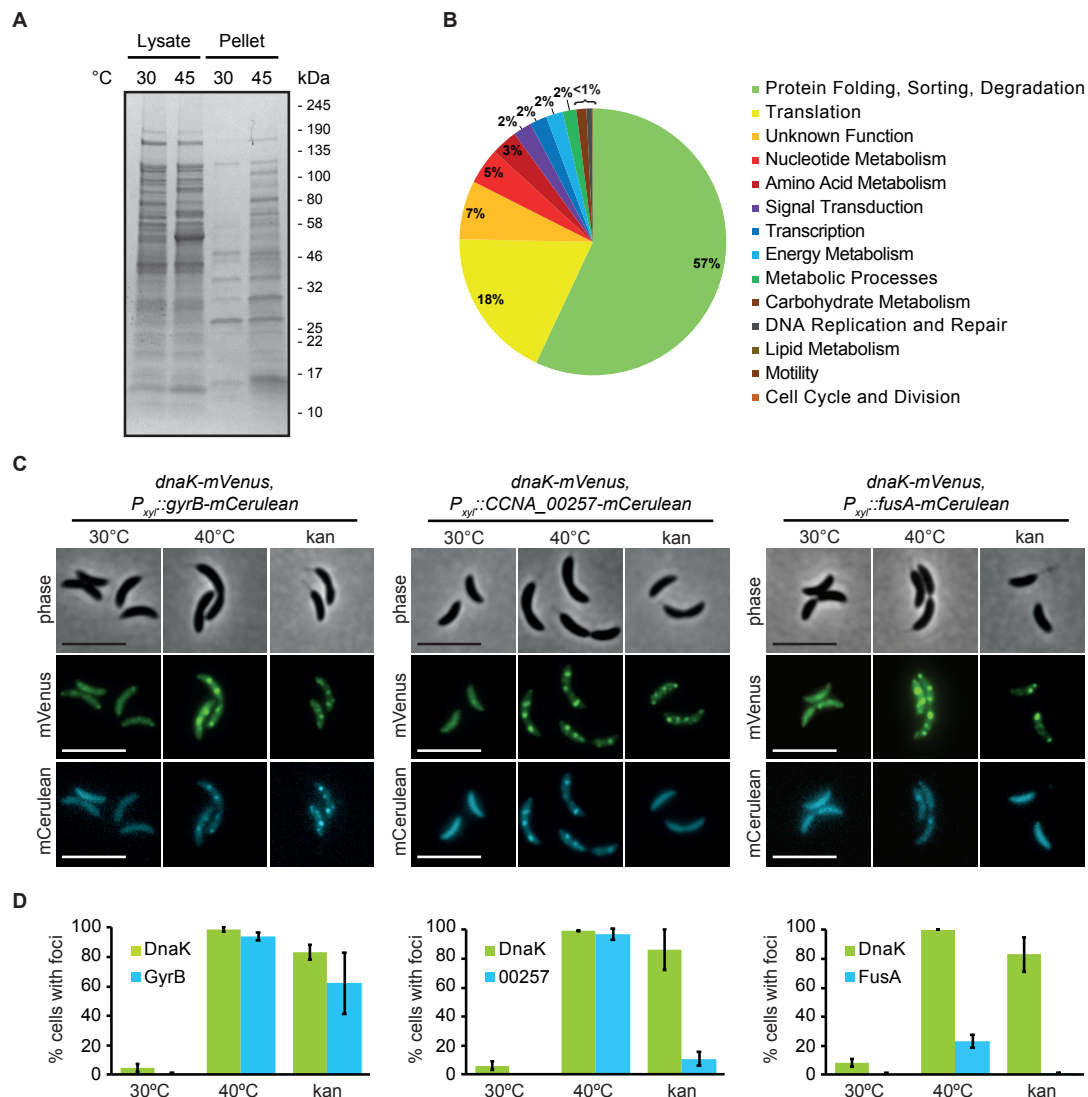

843

844 **Figure 2. Proteins governing diverse processes aggregate in *C. crescentus*.**

845 (A) Coomassie stained protein gel of soluble and detergent-resistant aggregated fractions  
 846 following heat stress. Wild type cultures at 30°C and 1 h at 45°C were collected and soluble  
 847 and insoluble fractions were separated by lysis and centrifugation. (B) Abundance of aggregate-  
 848 enriched proteins sorted by functional category. Functional categories were assigned to proteins  
 849 identified in (A) according to KEGG gene ontology, and the enrichment of aggregation-prone  
 850 proteins belonging to each category was determined to obtain relative abundance. (C)  
 851 Localization pattern of the aggregation-prone proteins GyrB, CCNA\_00257, and FusA at 30°C  
 852 and 40°C. Expression of the fusion proteins was induced for 3 h at 30°C, followed by 1 h  
 853 exposure to 40°C or 0.25 μM kanamycin. Scale bar is 5 μm. (D). Quantification of stress

854 induced relocalization of endogenous aggregating proteins and DnaK-mVenus shown in (C).

855 Quantifications show the means of biological duplicates where at least 152 cells each were

856 analyzed. Error bars represent standard deviation.

857

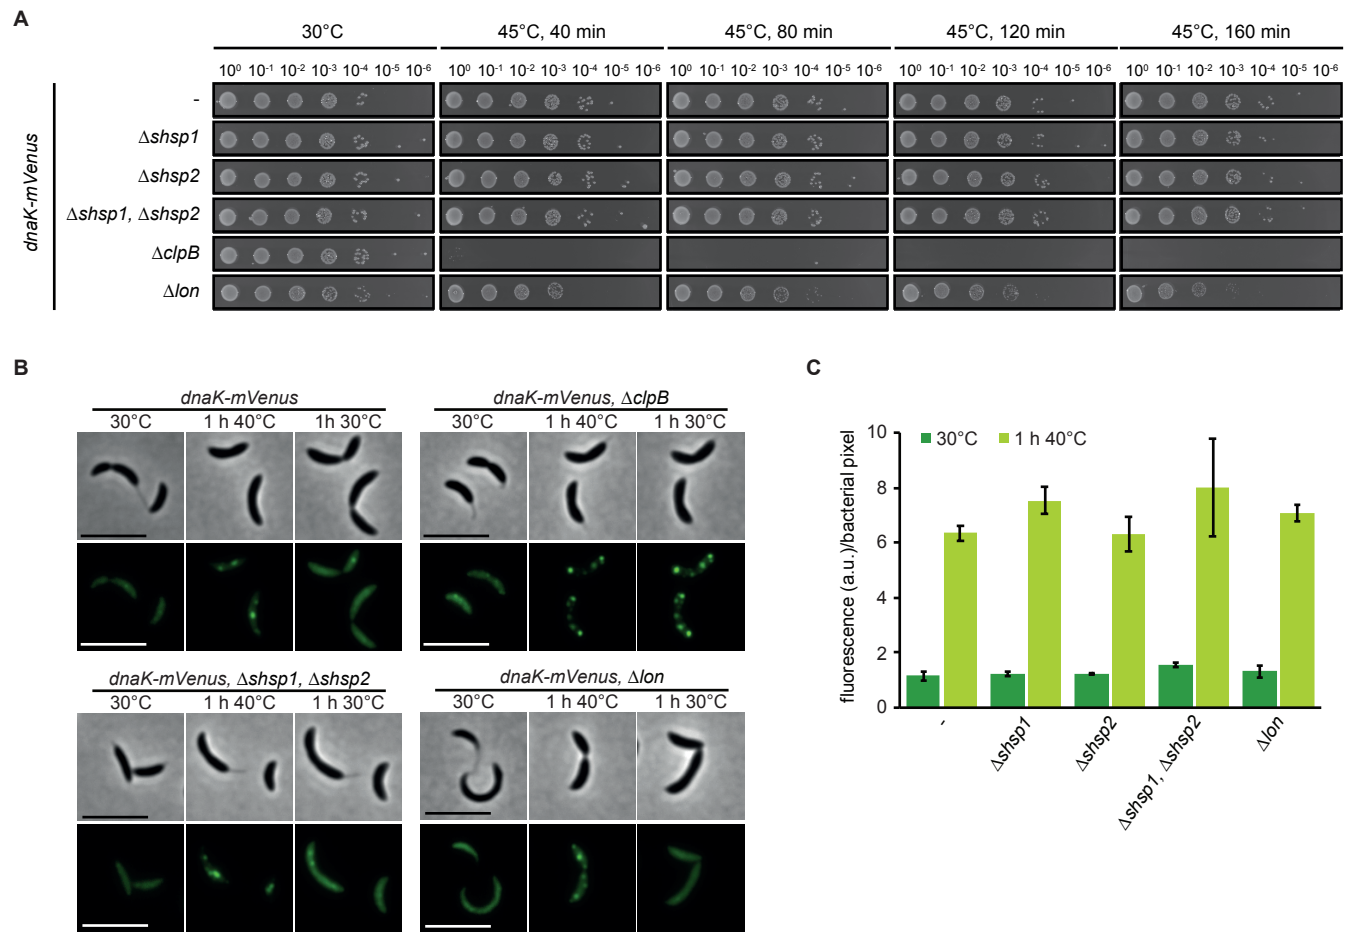

858

859 **Figure 3. Contribution of chaperones and proteases to stress resistance**

860 (A) Spot assays comparing colony formation of wild type, the *dnaK::dnaK-mVenus* strain and  
 861 its derivative strains harboring chaperone and protease knockouts grown at 30°C without stress  
 862 treatment or after 40, 80, 120 or 160 minutes of incubation at 45°C. (B) DnaK-mVenus  
 863 localization in the same strains as in (A) grown at 30°C or after heat shock in liquid culture at  
 864 40°C for one hour (1 h 40°C panels). After 40°C heat shock, cells were permitted to recover at  
 865 30°C for one hour (1 h 30°C panels), during which aggregate dissolution was monitored by  
 866 time lapse microscopy. (C) Absolute measurements of DnaK-mVenus fluorescence during  
 867 growth at 30°C and after one hour heat shock at 40°C. Quantifications show the means of  
 868 biological duplicates where at least 409 cells each were analyzed from 10 independent images.

869

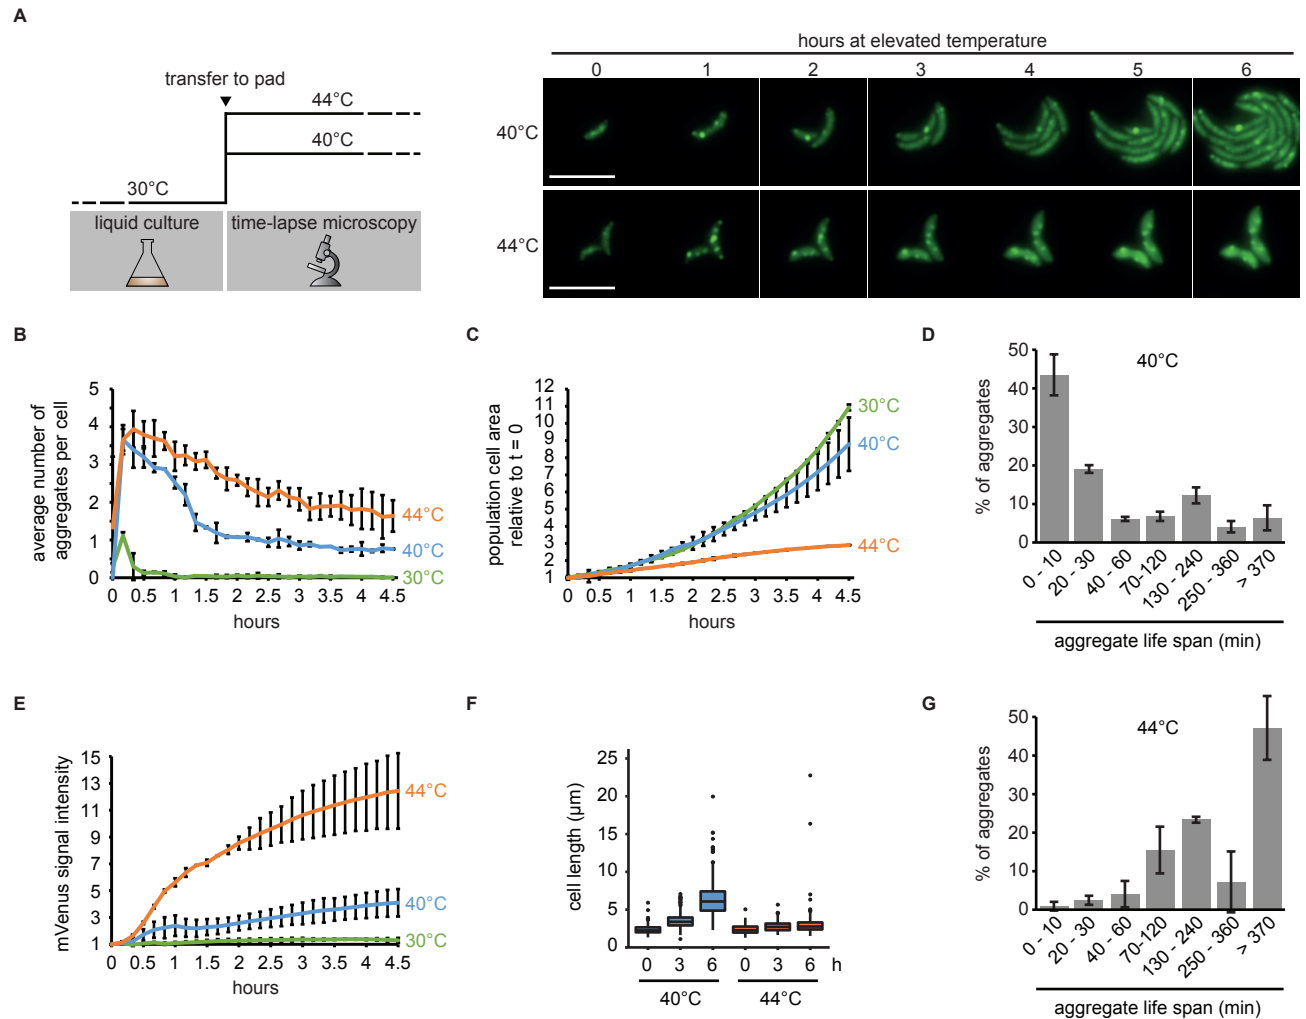

870

871 **Figure 4. Growth and protein aggregation dynamics during sustained heat stress.**

872 (A) Schematic of upshift experiments (left), and representative images following upshift to  
 873 40°C or 44°C over a six hour period. (B) Quantifications of fluorescence time-lapse microscopy  
 874 images showing the average number of aggregates per cell over time in cell populations  
 875 continuously grown at 30, 40 and 44°C. Note that after transfer to 30°C a minor fraction of dim  
 876 and short-lived DnaK-mVenus foci formed. (C) Total cell area increase during exposure to 30,  
 877 40, or 44°C relative to the first time point (t=0). Quantifications in (B, C) show the means of  
 878 biological triplicates for which at least 8 microcolonies each were analyzed. Error bars represent  
 879 standard deviations. (D) Quantification of aggregate life span in cells continuously exposed to  
 880 40°C. Aggregates present or emerging in the first 300 min of a fluorescence time-lapse movie

881 were tracked until 400 min. Images were acquired every 10 min. Quantifications show the  
882 means of biological triplicates for which at least five microcolonies and 89 aggregates each  
883 were analyzed. Error bars represent standard deviations. (E) DnaK-mVenus fluorescence  
884 intensity per bacterial pixel over time in cells grown at 30, 40, or 44°C normalized to the first  
885 time point (t=0). The same cells as in (B, C) were quantified. (F) Quantification of population  
886 cell lengths after 0, 3, and 6 hours continuous exposure to 40, or 44°C. The cell lengths of two  
887 biological replicates were pooled and populations representing at least 504 measurements are  
888 shown. (G) Quantification of aggregate life span in cells continuously exposed to 44°C.  
889 Aggregates present at 0 min were tracked until 480 min (new aggregates did not arise). Images  
890 were acquired every 10 min. Quantifications show the means of biological duplicates for which  
891 at least 14 microcolonies and 63 aggregates each were analyzed. Error bars represent standard  
892 deviations.  
893

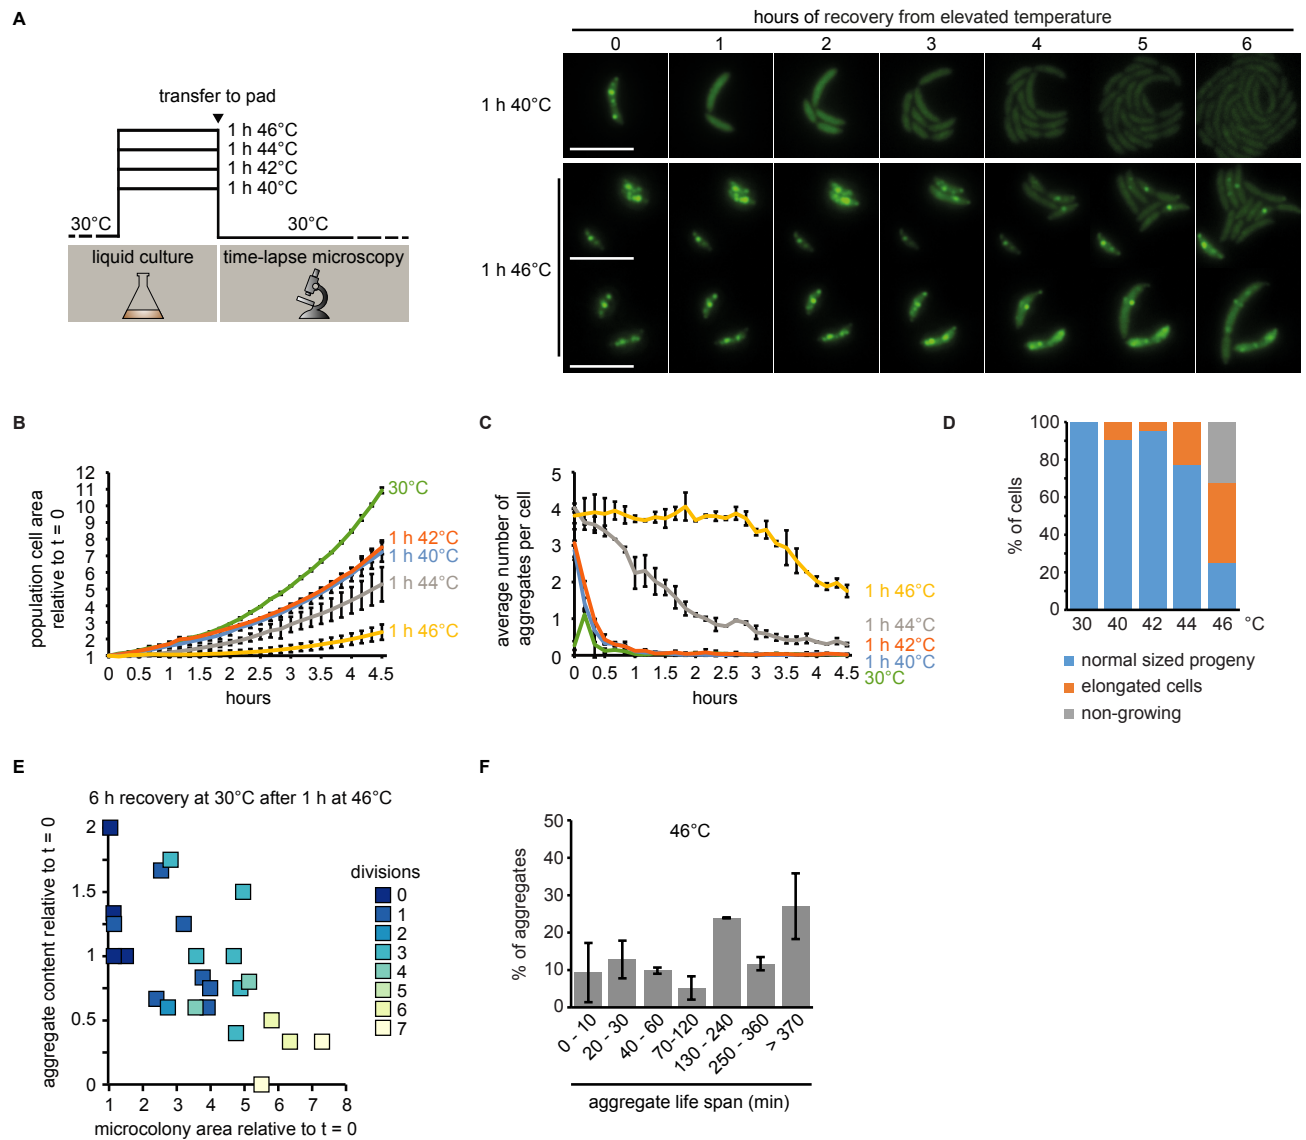

894

895 **Figure 5. Growth and aggregate clearance following stress recovery.**

896 (A) Schematic of recovery experiments (left) and representative images from recovery after  
 897 exposure to 40°C and 46°C for one hour. Two panels are shown for the 46°C condition to  
 898 represent the diversity of cell fates after stress release. (B) Quantifications of fluorescence time-  
 899 lapse microscopy showing the average number of aggregates per cell in cell populations  
 900 recovering from one hour of exposure to 40, 42, 44 and 46°C. (C) Total cell area increase over  
 901 time after release from one hour exposure to 40, 42, 44 and 46°C relative to the first time point  
 902 ( $t=0$ ). Quantifications in (B, C) show the means of biological duplicates for which at least 9  
 903 microcolonies each were analyzed. The data on cells continuously grown at 30°C are the same

904 as in Fig. 4. Error bars represent standard deviations. (D) Quantification of cell fates during  
905 continuous growth at 30°C, or recovery at 30°C after 1 h of exposure to 40, 42, 44 and 46°C.  
906 Quantifications are based on tracking at least 21 cells/microcolonies per duplicate condition.  
907 Cell/microcolony properties were quantified when the average total area of the population  
908 increased to four times the initial area. Growing cells/microcolonies were defined as those that  
909 at least doubled in area. Elongated cells or microcolonies containing those were considered as  
910 such when the average cell length in the microcolony was at least 1.5 times higher than the  
911 average cell length of a population grown to four times the cell area under continuous 30°C  
912 conditions. (E) Scatter plot representing relative area increase, relative aggregate number  
913 normalized to the amount present at stress release and the number of divisions of 24 cells and  
914 their potential progeny after six hours (the time at which the average area of the population has  
915 quadrupled) at 30°C on pad after release from one hour of exposure to 46°C. (F) Quantification  
916 of aggregate life span in cells recovering from exposure to 1 h 46°C forming microcolonies of  
917 mostly normally sized cells (D). Aggregates present or emerging in the first 400 min of a  
918 fluorescence time-lapse movie were tracked until 500 min. Images were acquired every 10 min.  
919 Quantifications show the means of biological duplicates for which at least eight microcolonies  
920 and 54 aggregates each were analyzed. Error bars represent standard deviations.  
921

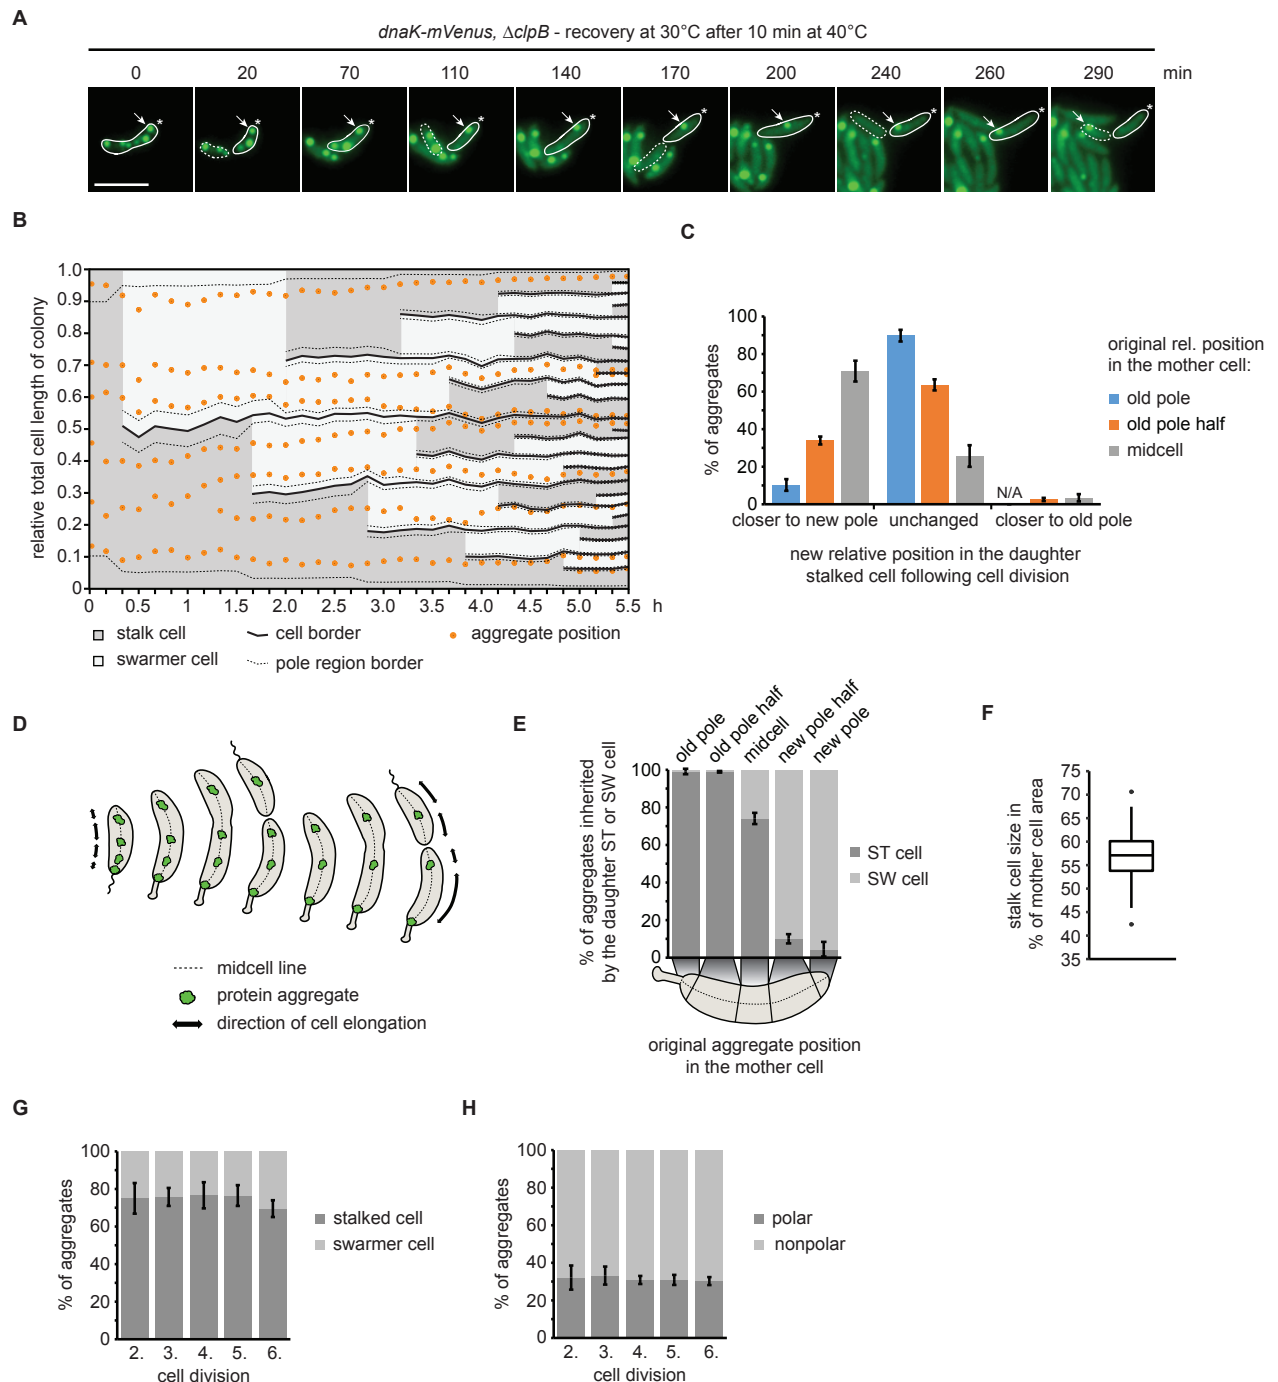

922

923 **Figure 6. Inheritance of persistent protein aggregates in the  $\Delta clpB$  background**

924 **recovering from heat stress.** (A) Representative fluorescence time-lapse images of the

925 recovery at 30°C after exposure to 40°C for 10 min pointing out the inheritance of an aggregate

926 originally localized in the old pole cell half after stress exposure (arrow). The star represents

927 the location of the old pole. The stalked cell is outlined by a solid and the swarmer cell by a

928 dashed line. (B) Kymograph normalized to the summed length of all descendants, showing



929 relative aggregate localization and cell polarity changes during microcolony growth. Cell  
930 borders arising through cell divisions are represented by solid lines while the 10% of the cell  
931 length defined as the pole region is indicated by dashed lines. (C) Quantitative data showing  
932 how aggregates change their relative cellular position in the daughter stalked cell as a  
933 consequence of cell division. (D) Schematic model of how cell growth contributes to the  
934 movement of stationary aggregates. (E) Proportion of aggregates inherited by either a swarmer  
935 or a stalked cell as function of their cellular position in the mother cell. (F) Quantification of  
936 the amount of the mother cell area inherited by the daughter stalked cell after a division event.  
937 Quantification based on 160 division events occurring in the third and fourth generation of 33  
938 microcolonies. (G) Percentage of aggregates inherited by the stalked or the swarmer daughter  
939 cell after the second to the sixth division. (H) Localization of aggregates tracked from the  
940 second to the sixth division. Aggregate position quantifications in (C, E, G and H) resulted from  
941 tracking the same population of aggregates from the second to the sixth division.  
942 Quantifications are based on biological triplicates for which at least 94 aggregates in at least 20  
943 microcolonies each were tracked. For the quantifications in (C) and (E) the aggregate positional  
944 changes after each division were binned leading to at least 376 aggregate positional changes  
945 tracked per replicate. Error bars represent standard deviations.

1 **Supporting Information**

2

3 **Growth-driven displacement of protein aggregates along the cell length**

4 **ensures partitioning to both daughter cells in *Caulobacter crescentus***

5 Frederic D. Schramm\*, Kristen Schroeder\*, Jonatan Alvelid, Ilaria Testa and Kristina Jonas

6 \* Equal contribution

7

8 **Content**

9 **Supporting Information Figure 1.** Viability and functionality of the fluorescent reporters used  
10 in this study.

11 **Supporting Information Figure 2.**  $\Delta clpB$  cells recovering from mild heat stress do not  
12 dissolve aggregates.

13 **Supporting Information Figure 3.** Representative time courses of cells continuously growing  
14 at 30°C or recovering from elevated temperature.

15 **Supporting Information Figure 4.** Growth and aggregate clearance in cells recovering from  
16 1 h of exposure to 44°C.

17 **Supporting Information Figure 5.** Schematic table summarizing how positional changes after  
18 cell divisions ranked by the position in the mother cell were quantified.

19 **Supporting Information Figure 6.** Inheritance of persistent protein aggregates in DnaK-  
20 mVenus cells continuously exposed to 40°C.

21 **Supporting Information Figure 7.** Inheritance of persistent protein aggregates in DnaK-  
22 mVenus cells continuously exposed to 44°C.

23 **Supporting Information Text 1**

24 **Supporting Information References**

25

26

27 **Additional Supporting Information:**

28 **Supporting Information Table 1.** Strains, plasmids and primers used in this study

29 **Supporting Information Table 2.** Proteins enriched in the aggregated fraction in *C. crescentus*

30 following exposure to 45°C

31 **Supporting Information Movie 1.** Time lapse microscopy of DnaK-mVenus upshift to 40°C

32

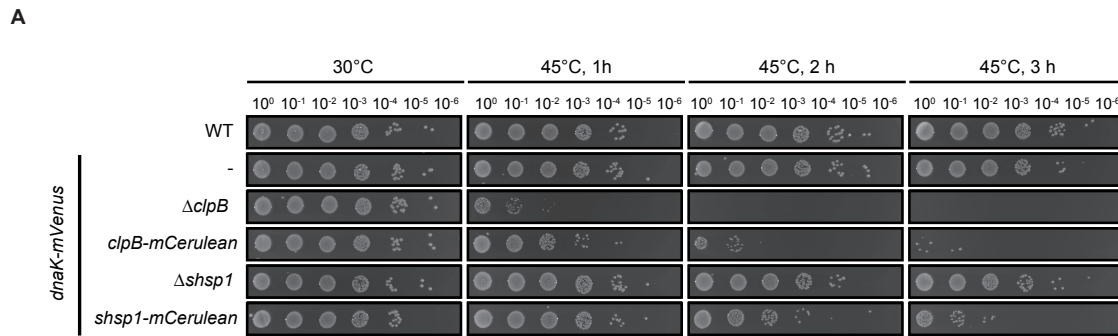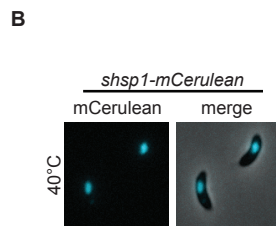

33

34 **Supporting Information Figure 1. Viability and functionality of the fluorescent reporters**

35 **used in this study.**

36 (A) Spot assays showing resistance to exposure of 45°C of the wild type and strains bearing the

37 indicated deletions or fusions in addition to DnaK-mVenus. (B) Microscopy images

38 demonstrating localization of the small heat shock proteins sHSP1 after 1 h at 40°C.

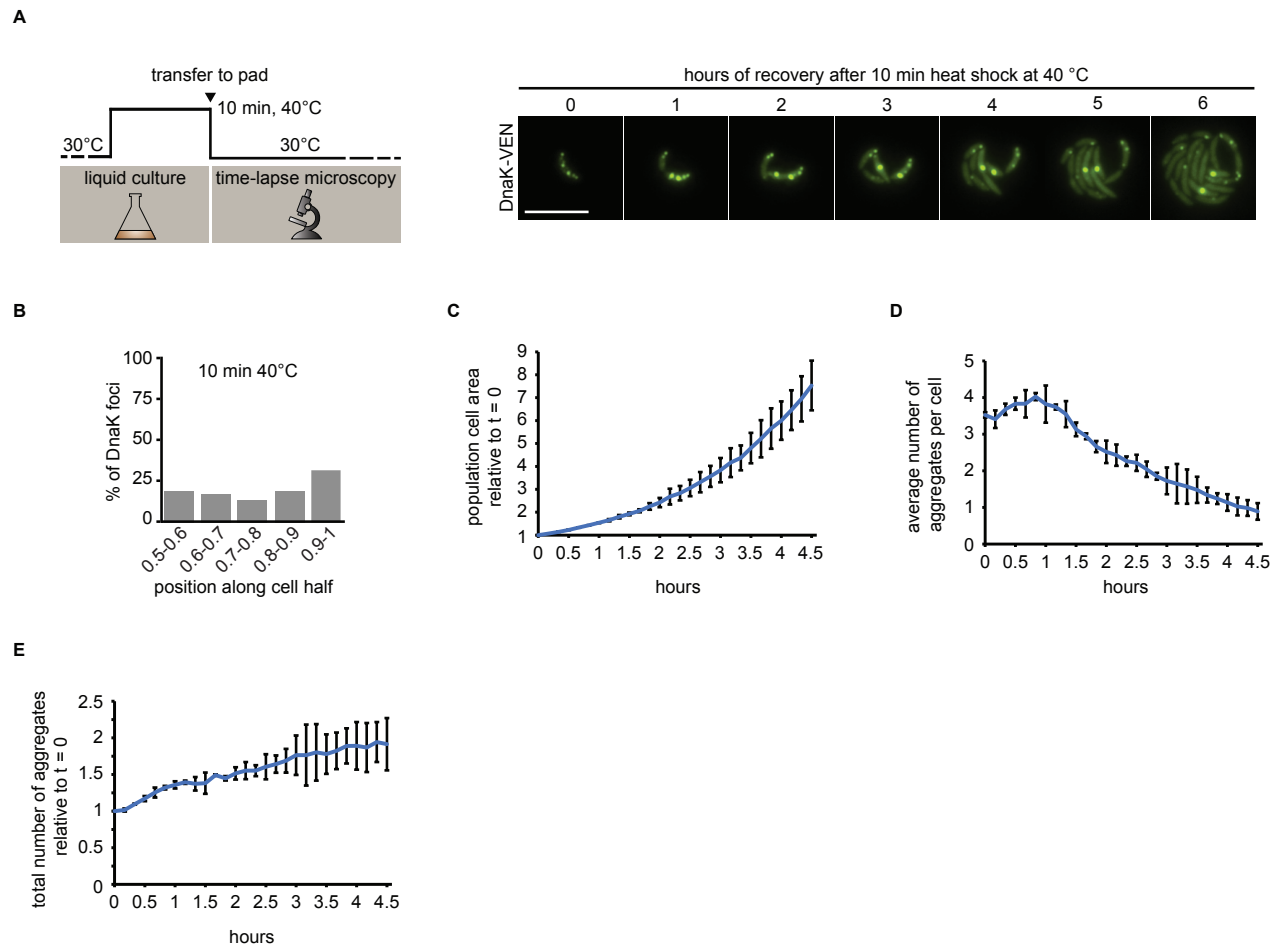

39

40 **Supporting Information Figure 2.  $\Delta clpB$  cells recovering from mild heat stress do not**  
41 **dissolve aggregates.**

42 (A) Schematic of recovery experiment (left) and representative images from  $\Delta clpB$  cell  
43 recovery after exposure to 40°C for 10 min. (B) Graph illustrating the position of DnaK-  
44 mVenus foci along five bins from midcell (0.5) to the cell pole (1) in  $\Delta clpB$  cells after a 10 min  
45 heat shock at 40°C in liquid medium. Quantification based on 313 cells harboring 1056  
46 aggregates. (C) Total population cell area increase relative to the area after stress exposure  
47 (t=0). (D) Average number of aggregates per cell over time. (E) Total number of aggregates  
48 present in the population over time normalized to time=0. Quantifications in (B-D) show the  
49 means of biological duplicates for which 19 microcolonies each were quantified. Error bars  
50 represent the standard deviation.

51

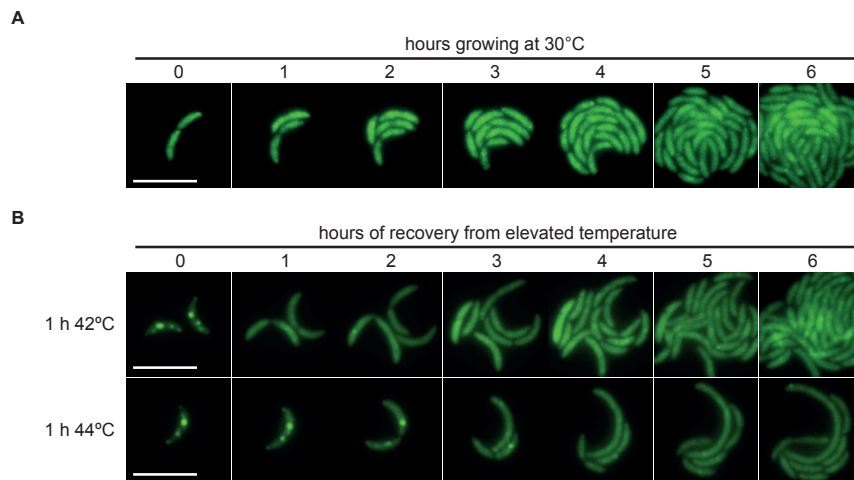

52

53 **Supporting Information Figure 3. Representative time courses of cells continuously**  
54 **growing at 30°C or recovering from elevated temperature.**

55 (A) Representative images of *C. crescentus* grown at 30°C in a heated microscopy chamber  
56 over a six hour period. (B) Representative images of *C. crescentus* grown at 30°C in a heated  
57 microscopy chamber during recovery from exposure to 42°C or 44°C over a six hour period.

58 Scale bar is 5 μm.

59

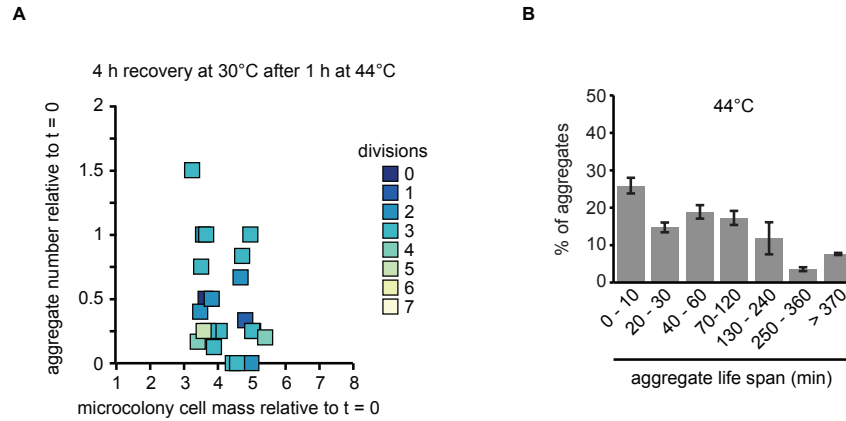

60

61 **Supporting Information Figure 4. Growth and aggregate clearance in cells recovering**  
62 **from 1 h of exposure to 44°C.**

63 (A) Scatter plot representing relative area increase, relative aggregate number normalized to  
64 the amount present at stress release, and the number of divisions of 22 cells and their progeny  
65 after four hours (the time at which the average area of the population has quadrupled) at 30°C  
66 after release from one hour of exposure to 44°C. (B) Quantification of aggregate life span in  
67 cells recovering from 44°C. Aggregates present or emerging in the first 400 min of a  
68 fluorescence time-lapse movie were tracked until 500 min. Images were acquired every 10 min.  
69 Quantifications show the means of biological duplicates for which at least ten microcolonies  
70 and 94 aggregates each were analyzed. Error bars represent standard deviations.

71

|  | original relative position in the mother cell                                                      | relative position in stalked daughter after cell division                                                                               |                                                                                                                                           |                                                                                                                                        |
|--|----------------------------------------------------------------------------------------------------|-----------------------------------------------------------------------------------------------------------------------------------------|-------------------------------------------------------------------------------------------------------------------------------------------|----------------------------------------------------------------------------------------------------------------------------------------|
|  |                                                                                                    | closer to new pole                                                                                                                      | unchanged                                                                                                                                 | closer to old pole                                                                                                                     |
|  | old pole<br>      | <br>10% <sup>1</sup> 6% <sup>2</sup> 8% <sup>3</sup>   | <br>90% <sup>1</sup> 94% <sup>2</sup> 92% <sup>3</sup> | N/A                                                                                                                                    |
|  | old pole half<br> | <br>34% <sup>1</sup> 58% <sup>2</sup> 81% <sup>3</sup> | <br>64% <sup>1</sup> 42% <sup>2</sup> 18% <sup>3</sup> | <br>2% <sup>1</sup> 0% <sup>2</sup> 1% <sup>3</sup> |
|  | midcell<br>       | <br>71% <sup>1</sup> 78% <sup>2</sup> 66% <sup>3</sup> | <br>26% <sup>1</sup> 21% <sup>2</sup> 30% <sup>3</sup> | <br>3% <sup>1</sup> 1% <sup>2</sup> 4% <sup>3</sup> |

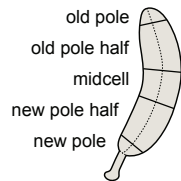

<sup>1</sup>aggregates in  $\Delta c/pB$  cells growing at 30°C after exposure to 40°C for 10 min (Fig. 6C)

<sup>2</sup>persistent aggregates in wild type cells (Fig. 4D) continuously exposed to 40°C (Supporting Information Fig. 5)

<sup>3</sup>persistent aggregates in wild type cells (Fig. 4E) recovering at 30°C from 1 h at 44°C (Supporting Information Fig. 6)

72

73 **Supporting Information Figure 5. Schematic table summarizing how positional changes**

74 **after cell divisions ranked by the position in the mother cell were quantified.**

75 The table shows how aggregate inheritance was analyzed for generating Figure 6C and

76 Supporting Information Fig. 6A, 7A. Percentage numbers represent the distribution of

77 aggregate positional changes.



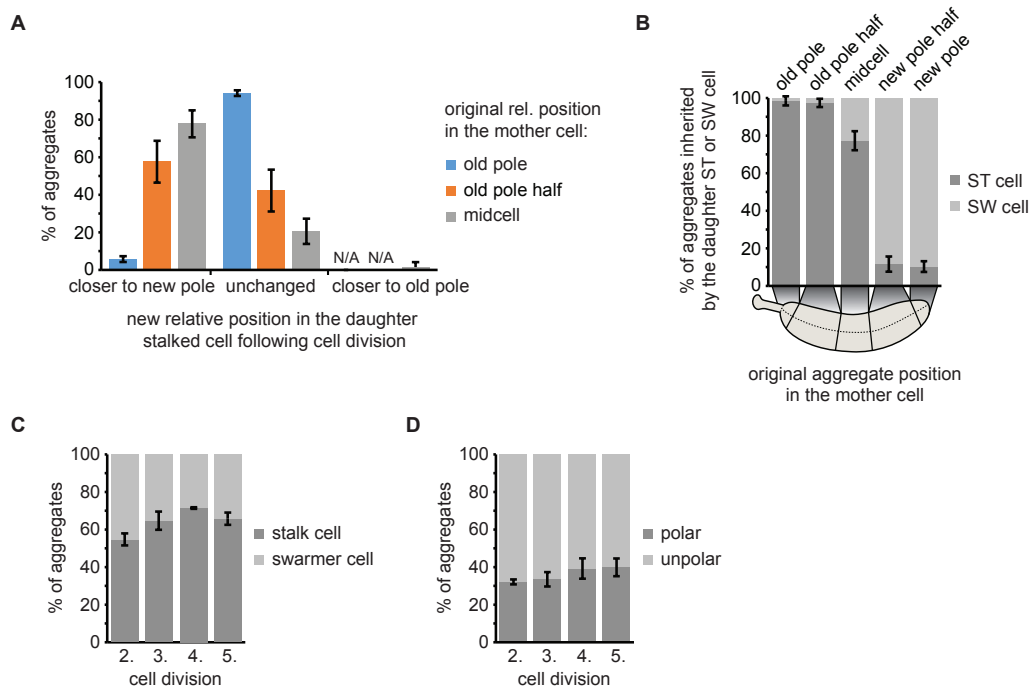

78

79 **Supporting Information Figure 6. Inheritance of persistent protein aggregates in DnaK-**  
 80 **mVenus cells continuously exposed to 40°C.**

81 (A) Distribution of aggregates becoming closer to the new pole, remaining stationary or  
 82 becoming closer to the old pole in the daughter stalked cell, ranked by position in the mother  
 83 cell. (B) Proportion of aggregates inherited by either a swarmer or a stalked cell as function of  
 84 their cellular position in the mother cell. (C) Percentage of aggregates inherited by the stalked  
 85 or the swarmer daughter cell after the second to the fifth division. (D) Localization of  
 86 aggregates tracked from the second to the fifth division. Aggregate position quantifications  
 87 resulted from tracking the same population of aggregates from the second to the fifth division.  
 88 Quantifications are based on biological triplicates for which at least 82 aggregates in at least 21  
 89 microcolonies each were tracked. For the quantifications in (A) and (B) the aggregate positional  
 90 changes after each division were binned leading to at least 246 aggregate positional changes  
 91 tracked per replicate. Error bars represent standard deviations.

92

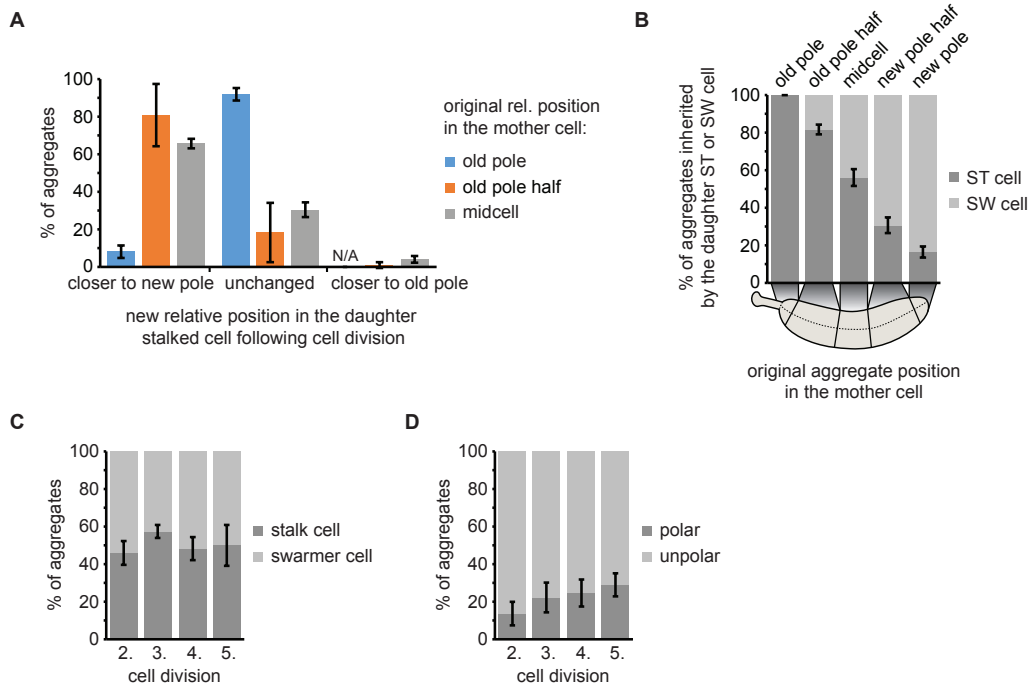

93

94 **Supporting Information Figure 7. Inheritance of persistent protein aggregates in DnaK-**  
 95 **mVenus cells continuously exposed to 44°C.**

96 (A) Distribution of aggregates becoming closer to the new pole, remaining stationary or  
 97 becoming closer to the old pole in the daughter stalked cell, ranked by position in the mother  
 98 cell. (B) Proportion of aggregates inherited by either a swarmer or a stalked cell as function of  
 99 their cellular position in the mother cell. (C) Percentage of aggregates inherited by the stalked  
 100 or the swarmer daughter cell after the second to the fifth division. (D) Localization of  
 101 aggregates tracked from the second to the fifth division. Aggregate position quantifications  
 102 resulted from tracking the same population of aggregates from the second to the fifth division.  
 103 Quantifications are based on biological triplicates for which at least 96 aggregates in at least 85  
 104 microcolonies each were tracked. For the quantifications in (A) and (B) the aggregate positional  
 105 changes after each division were binned leading to at least 288 aggregate positional changes  
 106 tracked per replicate. Error bars represent standard deviations.

## 107 **Supporting Information Text 1**

### 108 **Extended description of plasmid construction.**

109 **Construct for fluorescence reporter tagging of *dnaK* at the native locus (pKJ936):** A  
110 fragment containing the upstream homology region (UHR) made up of the last 600 bp of *dnaK*  
111 before the stop codon and encoding a GSG linker at the 3'-end was amplified using  
112 OFS193/318 from chromosomal DNA. The downstream homology region (DHR)  
113 encompassing the 665 bp downstream of the gene was amplified with OFS197/198 from  
114 chromosomal DNA. The fluorescence reporter encoding gene *mVenus* was amplified with  
115 OFS289/307. The fragments were assembled into *HindIII/EcoRI* restricted pNPTS138 by  
116 Gibson assembly (Gibson et al., 2009).

117 **Construct for fluorescence reporter tagging of *clpB* at the native locus (pKJ937):** A  
118 fragment comprising the UHR encompassing the last 635 bp of *clpB* before the stop codon as  
119 well as encoding a GSG linker at the 3'-end was amplified using OFS287/288 from  
120 chromosomal DNA. The DHR containing the 601 bp downstream of *clpB* was amplified with  
121 OFS290/291. The fluorescence reporter encoding gene *mCerulean* was amplified with  
122 OFS289/307. The fragments were assembled into OFS285/286 amplified pNPTS138 by Gibson  
123 assembly.

124 **Construct for fluorescence reporter tagging of *shsp1* (*CCNA\_02341*) at the native locus**  
125 **(pKJ938):** A fragment comprising the UHR encompassing 223 bp upstream of *shsp1*  
126 (*CCNA\_02341*), the entire gene except for the stop codon and encoding a GSG linker at the 3'-  
127 end was amplified using OFS292/293 from chromosomal DNA. The DHR containing the 594  
128 bp downstream of *shsp1* was amplified with OFS294/295. The fluorescence reporter encoding  
129 gene *mCerulean* was amplified with OFS289/307. The fragments were assembled into  
130 OFS285/286 amplified pNPTS138 by Gibson assembly.

131 **Constructs for vanillate-dependent expression of mCherry-ELK16 from the**  
132 **chromosomal *vanA* locus (pKJ939):** For the construction of pKJ939 the TP-linker-ELK16  
133 encoding sequence was added to the 3'-end of *mCherry* by sequential PCRs in two steps. First  
134 *mCherry* was amplified using OFS308/309 and the resulting fragment was used as a template  
135 for an amplification with OFS308/310. The resulting fragment was restriction cloned into  
136 *NdeI/XbaI* cut pBVMCS-2 resulting in pKJ949. This construct was used as a template to  
137 amplify *mCherry-ELK16* which was then restriction cloned into *NdeI/SacI* cut pVCHYN-4  
138 resulting in pKJ939.

139 **Constructs for xylose-dependent expression of mCerulean-tagged endogenous**  
140 **aggregating proteins from the chromosomal *xyIX* locus (pKJ941-943):** For the construction  
141 of pKJ941, pKJ942 and pKJ943, the endogenous genes were amplified from chromosomal  
142 DNA using OFS865/866, OFS869/870 or OFS880/881, respectively, and assembled with either  
143 OFS867/868, OFS871/868 or OFS875/879 amplified *mCerulean* into *NdeI/SacI* cut pXCHYN-  
144 1 by Gibson assembly.

145 **Constructs for deleting chaperone and protease encoding genes (pKJ944-946):** For making  
146 pKJ944 the UHR containing the 608 bp upstream and the first 15 bp of *ibpA* was amplified  
147 from genomic DNA using OFS795/796. The DHR containing the last 27 bp and the 586 bp  
148 downstream of *ibpA* was amplified with OFS797/798. The fragments were assembled with an  
149 OFS801/802 amplified *rif<sup>R</sup>*-cassette into *EcoRI/HindIII* cut pNPTS138 by Gibson assembly. In  
150 order to construct pKJ945 the UHR encompassing the 646 bp upstream and the first 15 bp of  
151 *ibpB* was amplified from genomic DNA using OFS809/817. The DHR containing the last 27  
152 bp and the 612 bp downstream of *ibpB* was amplified using OFS811/818. The homology region  
153 were assembled with an OFS25/26 *tet<sup>R</sup>*-cassette (pNPTS-*lon::tet<sup>R</sup>*) (Leslie et al., 2015) into  
154 *EcoRI/HindIII* cut pNPTS138 by Gibson assembly. For the generation of pKJ946 the UHR  
155 comprising the 606 bp upstream and the first 15 bp of *clpB* was amplified from genomic DNA

156 using OFS803/807. The DHR encompassing the last 27 bp and the 537 bp downstream of *clpB*  
157 was amplified with OFS805/808. The homology region were assembled with an OFS25/26  
158 amplified *tet<sup>R</sup>*-cassette (pNPTS-*lon::tet<sup>R</sup>*) (Leslie et al., 2015) into *EcoRI/HindIII* cut  
159 pNPTS138 by Gibson assembly.

160 **Constructs for ectopic overexpression of *dnaK*- and *dnaK(K70A)*-GSG-*mVenus* (pKJ950-**  
161 **951):** For constructing pKJ950 *dnaK* was amplified from chromosomal DNA with OFS302/303  
162 and assembled with OFS289/307 amplified *mVenus* into the OFS300/320 amplified vector  
163 pBVMCS-2 by Gibson assembly. In case of pKJ951 the mutation in *dnaK* was introduced by  
164 assembling two fragments by Gibson assembly which harbor the desired sequence alteration in  
165 the overlapping region. The fragments were amplified using OFS306/320 and OFS305/307,  
166 respectively, using pKJ951 as template.

167

168 **Extended description of strain construction.**

169 **Fluorescence reporter tagging of DnaK, ClpB and sHSP1 (CCNA\_02341) at the native**  
170 **locus (KJ952, KJ953, KJ969):** C-terminally tagging chromosomal chaperone genes with  
171 fluorescent reporter encoding sequences was achieved by a two-step recombination procedure  
172 (Skerker et al., 2005). *C. crescentus* NA1000 was transformed with pKJ936 to generate KJ952  
173 or with pKJ948 to generate KJ969. KJ952 was transformed with pKJ937 to generate KJ953.  
174 First integrants were selected for by plating on kanamycin-containing plates. Selected  
175 integrants were grown over night in PYE medium lacking kanamycin and plated on 3 % sucrose  
176 containing plates. Clones being both sucrose-resistant and kanamycin sensitive were verified  
177 for plasmid excision and fluorescent reporter gene insertion at the correct locus by colony PCR  
178 and fluorescence microscopy.

179

180

181

182 **Vanillate- and xylose-dependent expression of fluorescently tagged artificial and**  
183 **endogenous aggregating proteins as well as DnaK-GSG-mVenus from the chromosome**  
184 **(KJ955, KJ959-961):** Plasmids encoding for fluorescently tagged artificial, endogenous  
185 aggregating and untagged fluorescent proteins under the control of  $P_{vanA}$  or  $P_{xylX}$  were integrated  
186 through homologous recombination at the chromosomal *vanA* or *xylX* site, respectively.  
187 Integrants were selected by the plasmid encoded antibiotic resistance and verified by colony  
188 PCR. KJ953 was transformed with pKJ939 to generate KJ955. For the generation of KJ959,  
189 KJ960 and KJ961, KJ952 cells were transformed with pKJ941, pKJ942 and pKJ943,  
190 respectively.

191 **Wt DnaK- and DnaK(K70A)-GSG-mVenus overexpressing strains (KJ956, KJ957):** *C.*  
192 *crescentus* NA1000 was transformed with the replicating plasmids pKJ950 and pKJ951 to  
193 obtain KJ956 and KJ957, respectively.

194 **Chaperone and protease knockout strains (KJ962-966):** Antibiotic-resistance marked  
195 knockouts of chaperone and protease encoding genes were obtained by two step recombination  
196 under constant exposure to the antibiotic against which the resistance cassette replacing the  
197 deleted gene sequence provides protection. KJ952 was transformed with either pKJ944,  
198 pKJ945, pKJ946 or pNPTS-*lon::tet<sup>R</sup>* for the generation of KJ962, KJ963, KJ964 and KJ966,  
199 respectively. For constructing KJ965, KJ962 was transformed with pKJ945. Clones were  
200 verified by colony PCR.

## 201 **Supporting Information References**

202 Gibson DG, Young L, Chuang R-Y, Venter JC, Hutchison CA, Smith HO. 2009. Enzymatic  
203 assembly of DNA molecules up to several hundred kilobases. *Nat Methods* **6**:343–345.

204 doi:10.1038/nmeth.1318

205 Leslie DJ, Heinen C, Schramm FD, Thüring M, Aakre CD, Murray SM, Laub MT, Jonas K.

206 2015. Nutritional Control of DNA Replication Initiation through the Proteolysis and

207 Regulated Translation of DnaA. *PLOS Genet* **11**:e1005342.

208 doi:10.1371/journal.pgen.1005342

209 Skerker JM, Prasol MS, Perchuk BS, Biondi EG, Laub MT. 2005. Two-component signal

210 transduction pathways regulating growth and cell cycle progression in a bacterium: a

211 system-level analysis. *PLoS Biol* **3**:e334. doi:10.1371/journal.pbio.0030334

212
